# Supplementary material
Source: PubMed Central journal article supplement (PMC9559831)
Supplement: 40249_2022_1024_MOESM1_ESM.pdf [file 40249_2022_1024_MOESM1_ESM.pdf]

Additional file 1 for

**A unified global genotyping framework of dengue virus serotype-1 for a stratified coordinated surveillance strategy of dengue epidemics**

Liqiang Li<sup>#</sup>, Xiang Guo<sup>#</sup>, Xiaoqing Zhang, Lingzhai Zhao, Li Li, Yuji Wang, Tian Xie, Qingqing Yin, Qinlong Jing, Tian Hu, Ziyao Li, Rangke Wu, Wei Zhao, Sherman Xuegang Xin, Benyun Shi, Jiming Liu, Shang Xia, Zhiqiang Peng, Zhicong Yang, Fuchun Zhang<sup>\*</sup>, Xiao-Guang Chen<sup>\*</sup>, Xiaohong Zhou<sup>\*</sup>

<sup>#</sup>These authors contributed equally to this work.

<sup>\*</sup> Correspondence: Xiaohong Zhou (daizhouxh@163.com) ; Xiao-Guang Chen (xgchen2001@hotmail.com) ; Fuchun Zhang (gz8hzfc@126.com)

# List of Supplementary Figures, Tables

## Preface

1. **Additional file 1 Fig. S Pre. 1** Blueprint for this study.

## Section A. Data selection and quality control

2. **Additional file 1 Table S A1** Recombination events of DENV-1 scanned by seven models.
3. **Additional file 1 Table S A2** Summary of 5003 DENV-1 strains eligible for inclusion in this study.

## Section B. Establishment of a unified high-resolution global genotyping framework of DENV-1

4. **Additional file 1 Fig. S B1** The viral population numbers and intra-population diversity of DENV-1 inferred using BAPS hierarchical clustering.
5. **Additional file 1 Fig. S B2** Characteristics of MPDs of BAPS raw clusters.
6. **Additional file 1 Fig. S B3** Demography of DENV-1 subgenotypes and clades.
7. **Additional file 1 Table S B1** Summary of characteristics of the designated subgenotypes in genotypes I, IV, and V of DENV-1.
8. **Additional file 1 Table S B2** Summary of characteristics of the designated clades in genotypes I, IV, and V of DENV-1.

## Section C. Ancestral state reconstruction and molecular clock phylogenetic analyses

9. **Additional file 1 Table S C1** Characteristics of each designated subgenotype in genotypes I, IV, and V of DENV-1 worldwide.
10. **Additional file 1 Table S C2** Characteristics of each designated clade in genotypes I, IV, and V of DENV-1 worldwide.

## Section D. Characterization of the unified global genotyping framework of DENV-1

11. **Additional file 1 Fig. S D1** Trends of global increasing expansion of DENV-1.
12. **Additional file 1 Table S D1** The associations between the substitution rates and tMRCA of the included clades evaluated by the linear regression model after adjustment of the strains number, MPDs and Simpson Index.

## Section E. Global geographic distribution and epidemic regional classification

13. **Additional file 1 Fig. S E1** Global geographical distributions of genotypes I, IV, and V of DENV-1 by countries/areas.
14. **Additional file 1 Fig. S E2** Global spreading of DENV-1 genotypes I, IV, and V clades by countries/areas from 1944 to 2017 counted by every ten years.

15. **Additional file 1 Fig. S E3** Geographical hierarchical clustering of DENV-1 at the genotype and subgenotype levels.
16. **Additional file 1 Fig. S E4** Heatmap of defined clade distribution displayed by 12 epidemic regions by percentages.
17. **Additional file 1 Fig. S E5** Global geographical distributions of genotypes I, IV, and V of DENV-1 represent by 12 classified epidemic regions.
18. **Additional file 1 Fig. S E6** Heatmap of the defined clade distribution displayed by countries/areas by percentage.
19. **Additional file 1 Fig. S E7** Relatively specific circulation patterns of subgenotypes and clades kept relative steady in each epidemic region.
20. **Additional file 1 Table S E1** Compositions of countries/areas in the defined 12 epidemic regions of DENV-1.

#### **Section F. Global transmission pattern of DENV-1 at subgenotype level**

21. **Additional file 1 Fig. S F1** Estimates of 29 DENV-1 subgenotypes involving the transmission pairs inferred by BSSVS.
22. **Additional file 1 Fig. S F2** DENV-1 transmission pairs in each epidemic country/area within and without its belonging epidemic regions inferred by BSSVS at the subgenotype level.
23. **Additional file 1 Table S F1** The transmission pairs with involved subgenotypes  $\cong 3$ .
24. **Additional file 1 Table S F2** The transmission pairs inferred by BSSVS from 29 DENV-1 subgenotypes .

#### **Section G. Sources and trend of DENV-1 diffusion at clade level**

25. **Additional file 1 Fig. S G1** Dynamic changes of trunks representing the proportion of PACT-inferred dominant epidemic countries/areas for each DENV-1 clade circulation.
26. **Additional file 1 Fig. S G2** Temporal dynamics of clades in 28 PACT-inferred dominant countries/areas.
27. **Additional file 1 Table S G1** The status of 28 PACT-inferred dominant epidemic countries/areas and the clades of DENV-1 involved.

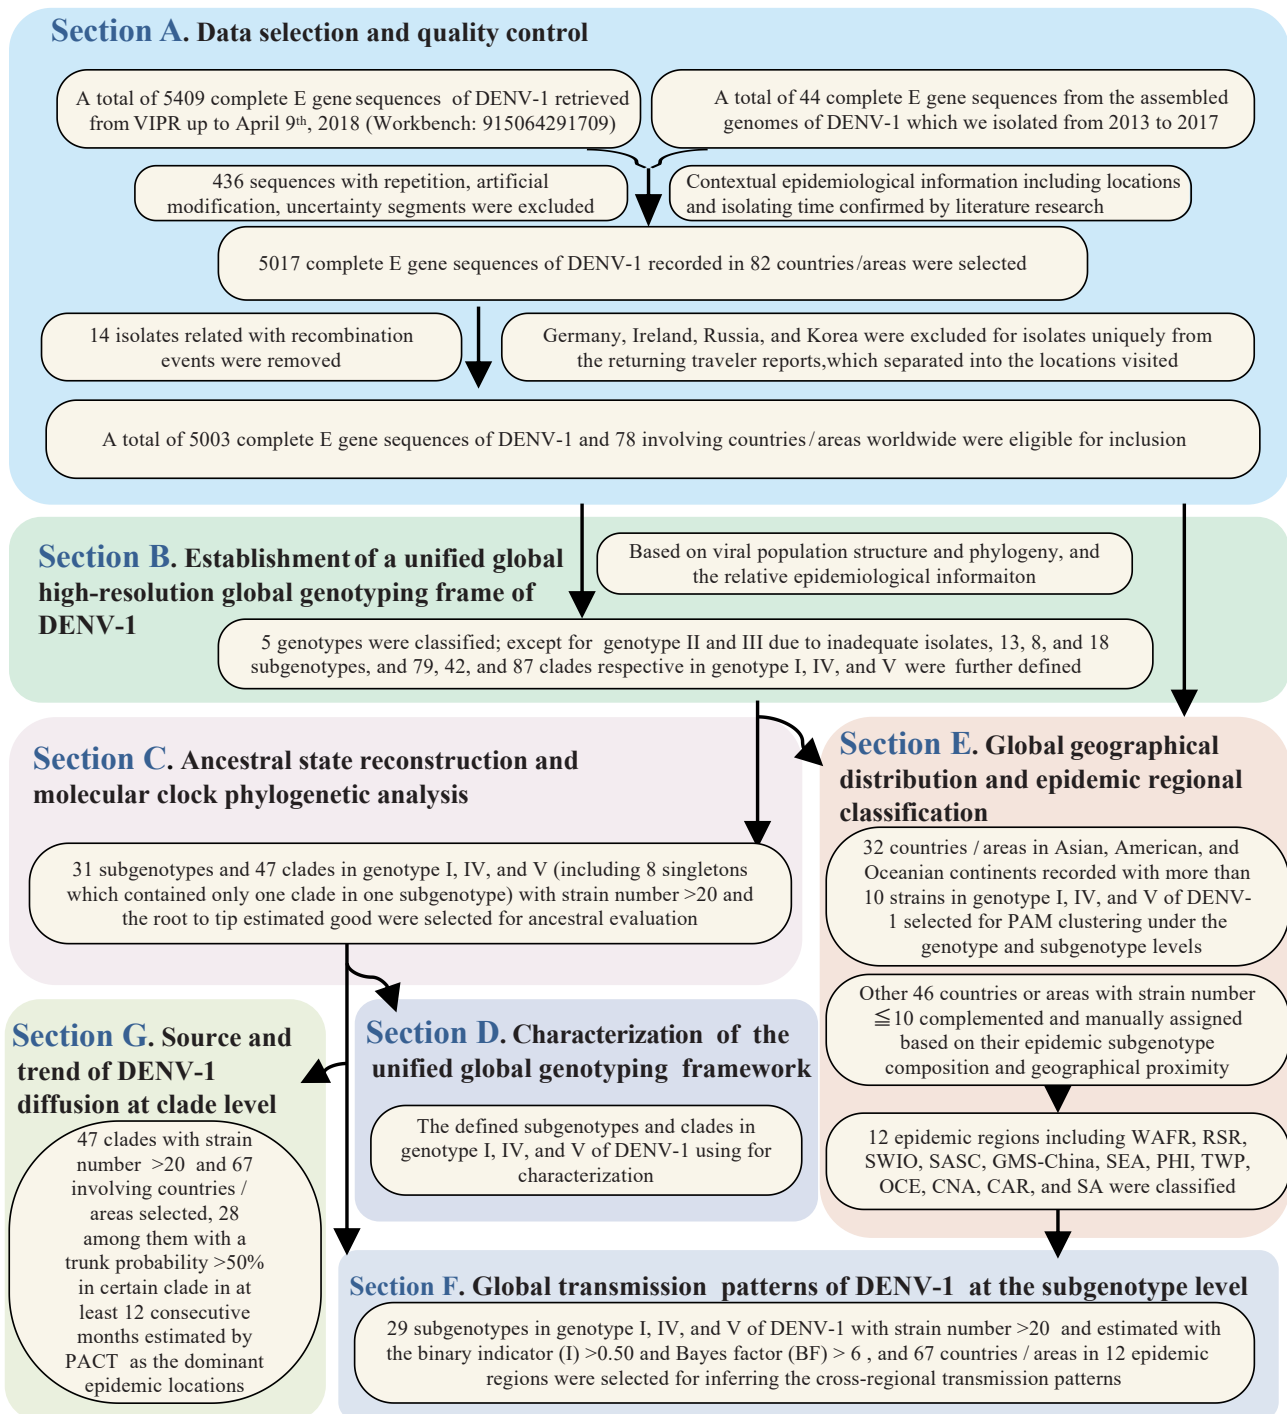

Additional file 1 Fig. S Pre.1 Blueprint for this study

## A. Data selection and quality control

Additional file 1 Table S A1 Recombination events of DENV-1 scanned by seven models

| Event | Recombination events      | Major parent                   | Minor parent            | Detection method |   |   |   |   |   |   |
|-------|---------------------------|--------------------------------|-------------------------|------------------|---|---|---|---|---|---|
|       |                           |                                |                         | R                | G | B | M | C | S | T |
| 1     | 1997 FJ196847 China       | 2004 EU448386 Thailand         | 2007 EU448409 Indonesia | +                | + | + | + | + | + | + |
| 2     | 1999 FJ196848 China       | 1997 AY376737 China            | 2007 EU448409 Indonesia | +                | + | - | + | + | + | + |
| 3     | 2013 KF184975 Anogla      | 2013 KU570098 China            | 2010 JN029812 China     | +                | - | + | + | + | + | + |
| 4     | 2010 JN029812 China       | 2014 KY038891 China            | 2004 EU448410 China     | +                | + | + | + | + | + | + |
| 5     | 1994 AY780642 Puerto_Rico | 2000 AY277663 Argentina        | Unknown                 | +                | + | + | + | + | - | + |
| 6     | 2006 EU179861 Brunei      | 2013 KY818128 Philippine       | 2014 KT239246 Pakistan  | +                | + | + | + | + | - | + |
| 7     | 2011 KY882520 Malaysia    | 2010 JN415491 Indonesia        | 2006 KF955414 Venezuela | +                | + | + | - | - | + | + |
| 8     | 2014 KY038891 China       | 2001 DQ265068 Myanmar          | Unknown                 | +                | + | + | + | - | + | + |
| 9     | 2004 EF032589 China       | 2007 EU448409 Indonesia        | 2008 KU509257 Thailand  | +                | + | + | + | - | - | + |
| 10    | 1980 D00502 Thailand      | 1983 AF42561 Australia         | 2006 KF955414 Venezuela | +                | + | + | + | + | + | + |
| 11    | 1995 AY373427 China       | 2007 JQ655005 French_Polynesia | 1997 AY376737 China     | +                | + | - | + | + | + | + |
| 12    | 2015 KX056474 China       | Unknown                        | 2013 KR051929 Myanmar   | -                | - | - | + | + | + | + |
| 13    | 2005 JF297583 India       | 2005 EU081258 Singapore        | 2014 KT239346 Pakistan  | +                | + | - | - | + | + | + |
| 14    | 2013 KP903780 Brazil      | 2013 KP858113 Brazil           | Unknown                 | -                | - | - | + | - | - | - |

Note: A suite of seven methodologies were implemented in RDP v.4.97 including RDP method, GENECONV, BOOTSCAN, MAXCHI, CHIMAERA, SISCAN, 3SEQ R: RDP; G: GENECONV; B: BootScan; M: MaxChi; C: Chimaera; S: SiScan; T: 3Seq

Additional file 1 Table S A2 Summary of 5003 DENV-1 strains eligible for inclusion in this study

| Continent and region | Country/area of isolates<br>(number and name) | Range of isolation dates<br>(year) | Number of isolates <sup>a</sup> |
|----------------------|-----------------------------------------------|------------------------------------|---------------------------------|
| <b>-Worldwide</b>    | 78                                            | 1944 - 2017                        | 5003                            |
| <b>Africa</b>        | 11                                            | 1968 - 2013                        | 42                              |
| <b>WAFR</b>          | 3                                             | 1968 - 2013                        | 11                              |
|                      | Nigeria                                       | 1968                               | 1                               |
|                      | Côte d'Ivoire                                 | 1985 - 1999                        | 2                               |
|                      | Angola                                        | 1988 - 2013                        | 8                               |
| <b>RSR</b>           | 4                                             | 1988 - 2011                        | 17                              |
|                      | Djibouti                                      | 1988                               | 1                               |
|                      | Eritrea                                       | 2010                               | 1                               |
|                      | Saudi Arabia                                  | 1994 - 2011                        | 10                              |
|                      | Somalia                                       | 2011 - 2011                        | 5                               |
| <b>SWIO</b>          | 4                                             | 1993-2006                          | 14                              |
|                      | Madagascar                                    | 2006                               | 1                               |
|                      | Seychelles                                    | 2003-2004                          | 3                               |
|                      | Reunion                                       | 2004-2004                          | 9                               |
|                      | Comoros                                       | 1993                               | 1                               |
| <b>Asia</b>          | 19                                            | 1956-2017                          | 3487                            |
| <b>SASC</b>          | 7                                             | 1956-2016                          | 155                             |
|                      | India                                         | 1956-2015                          | 73                              |
|                      | Pakistan                                      | 2014-2014                          | 10                              |
|                      | Sri Lanka                                     | 2004-2014                          | 23                              |
|                      | Bangladesh                                    | 2009                               | 1                               |
|                      | Maldives                                      | 2011-2016                          | 4                               |
|                      | Bhutan                                        | 2013-2013                          | 33                              |
|                      | Nepal                                         | 2010-2010                          | 11                              |
| <b>GMS-China</b>     | 7                                             | 1958-2017                          | 2580                            |
|                      | Viet nam                                      | 1998-2016                          | 1165                            |
|                      | Myanmar                                       | 1971-2015                          | 343                             |
|                      | Cambodia                                      | 1998-2013                          | 105                             |
|                      | Thailand                                      | 1958-2015                          | 347                             |
|                      | Laos                                          | 1996-2011                          | 91                              |
|                      | China                                         | 1979-2017                          | 518                             |
|                      | Japan                                         | 2014-2014                          | 11                              |
| <b>SEA</b>           | 5                                             | 1972-2015                          | 752                             |
|                      | Indonesia                                     | 1988-2015                          | 333                             |
|                      | Malaysia                                      | 1972-2015                          | 68                              |
|                      | Singapore                                     | 1993-2015                          | 297                             |
|                      | Australia                                     | 1983-2015                          | 31                              |
|                      | East Timor                                    | 2000-2010                          | 23                              |
| <b>Oceania</b>       | 19                                            | 1944-2016                          | 377                             |
| <b>PHI</b>           | 2                                             | 1974-2016                          | 129                             |
|                      | Philippines                                   | 1974-2016                          | 128                             |
|                      | Palau                                         | 2000                               | 1                               |
| <b>TWP</b>           | 5                                             | 1973-2016                          | 24                              |
|                      | Papua New Guinea                              | 2003-2016                          | 15                              |
|                      | Marshall Is.                                  | 2003                               | 1                               |
|                      | Solomon Is.                                   | 2002-2002                          | 2                               |
|                      | F.S. of Micronesia                            | 2002-2004                          | 5                               |
|                      | Nauru                                         | 1973                               | 1                               |
| <b>OCE</b>           | 12                                            | 1944-2015                          | 224                             |
|                      | New Caledonia                                 | 2001-2012                          | 67                              |

|                |                     |    |           |      |
|----------------|---------------------|----|-----------|------|
|                | French Polynesia    |    | 1989-2015 | 102  |
|                | Vanuatu             |    | 2010      | 1    |
|                | Cook Is.            |    | 2002-2007 | 3    |
|                | Fiji                |    | 2002-2014 | 15   |
|                | Niue                |    | 2012-2102 | 3    |
|                | Tonga               |    | 2008-2008 | 2    |
|                | Hawaiian Is.        |    | 1944-2001 | 22   |
|                | Wallis and Futuna   |    | 2003      | 1    |
|                | Easter Island       |    | 2002      | 1    |
|                | Kiribati            |    | 2012-2012 | 4    |
|                | Samoa               |    | 2001-2001 | 3    |
| <b>America</b> |                     | 29 | 1944-2016 | 1080 |
| <b>CNA</b>     |                     | 7  | 1982-2014 | 385  |
|                | Mexico              |    | 1982-2013 | 250  |
|                | Costa Rica          |    | 1993-2014 | 21   |
|                | Nicaragua           |    | 2004-2014 | 72   |
|                | Honduras            |    | 2008-2014 | 4    |
|                | United States       |    | 1995-2014 | 29   |
|                | Belize              |    | 2005-2010 | 4    |
|                | El Salvador         |    | 1993-2012 | 5    |
| <b>CAR</b>     |                     | 19 | 1944-2016 | 365  |
|                | Barbados            |    | 1995-2013 | 6    |
|                | Saint Barthélemy    |    | 2016      | 1    |
|                | Peru                |    | 1991      | 1    |
|                | Ecuador             |    | 2014-2014 | 6    |
|                | Colombia            |    | 1985-2015 | 139  |
|                | Virgin Is.          |    | 1985      | 1    |
|                | Jamaica             |    | 1977-2012 | 3    |
|                | Puerto Rico         |    | 1986-2013 | 92   |
|                | Guyana              |    | 2008      | 1    |
|                | Haiti               |    | 2010-2014 | 7    |
|                | Grenada             |    | 1977-1981 | 9    |
|                | Trinidad and Tobago |    | 1978-1986 | 3    |
|                | Suriname            |    | 1981-2012 | 2    |
|                | Aruba               |    | 1985-2004 | 3    |
|                | Venezuela           |    | 1944-2011 | 83   |
|                | French Guiana       |    | 1989      | 1    |
|                | Bahamas             |    | 1977      | 1    |
|                | Dominica            |    | 2010-2010 | 3    |
|                | Martinique          |    | 2008-2008 | 3    |
| <b>SA</b>      |                     | 3  | 1982-2016 | 330  |
|                | Argentina           |    | 1999-2016 | 130  |
|                | Brazil              |    | 1982-2014 | 182  |
|                | Paraguay            |    | 1999-2011 | 18   |
| <b>NA</b>      |                     |    |           | 17   |

<sup>a</sup> 5003 DENV-1 isolates including Genotype I: 2952; II:4; III: 2; V:560, and V: 1485 were identified in this study, see details in Fig. 1 and Additional file 1 Section B-D. WAFR, West African Region; RSR, Red Sea Region; SWIO, Southwest Indian Ocean; SASC, South Asia Subcontinent; GMS-China, Great Mekong Subregion-China; SEA, Southeast Asia; PHI, Philippines; TWP, Tropical Western Pacific; OCE, Oceania; CNA, Central North America; CAR, Caribbean; SA, South America. These 12 epidemic regions of DENV-1 were classified in this study, see details in Fig. 2 and Additional file 1 Section E.

## B. Establishment of a unified high-resolution global genotyping framework of DENV-1

Our designation of subgenotypes and clades were well supported by BAPS clustered populations and phylogenetic robust bootstrap. Among them, the UFBoot support values of 32 (82%,32/39) designated genotypes and 162 (77.9%, 162/208) clades of DENV-1 genotypes I, IV, and V were higher than 70%, and 30 subgenotypes and 134 clades more than 90% (Table S B1-B2). While the subgenotypes and clades with the UFBoot values lower than 70%, some of them were singletons which containing only one clade or strain-including 4 subgenotypes 1E,1F, 5F and 5I, and 12 clades 1A17, 1M5, 1M6, 4A4, 4A6, 4A7, 4E3, 5F1, 5K18, 5N5, 5N6, and 5P10; some were mainly or uniquely from single country/area such as 1A15 from Somalia, 1D4 and 1E1 from Vietnam, 1G7,1G9, and 1G10 from Myanmar, 1H1 and 1J3 from Thailand, 1M1,1M2,1M9 and 4E8 from Indonesia, 4C2 from Philippines, 5N3 from Venezuela, 5N7 from Brazil, 5N11 from Honduras, 5O3 and 5O4 from Mexico, and 5Q2 from Puerto Rico, and so on (Table S B1-B2). Otherwise, the singletons in subgenotypes (12/41) (Table S C1) and clades (63/208) (Table S C2) in genotype I, IV, and V may suggest that these are DENV-1 population in minority, while otherwise might be partly caused by widely deficient surveillance.

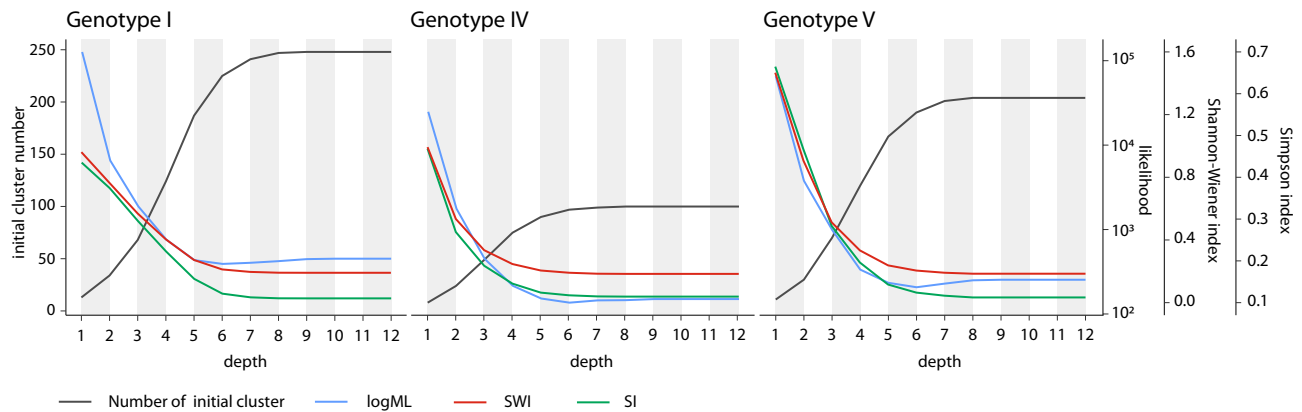

**Additional file 1 Fig. S B1 The viral population numbers and intra-population diversity of DENV-1 inferred using BAPS clustering.** Three panels represent genotype I (Left), IV (Middle) and V (Right) of DENV-1, respectively. Lines with grey, blue, red, and green colour represent initial cluster number, logML, SWI, and SI, respectively. logML: log maximum likelihood, SWI: Shannon-Wiener index, SI: Simpson index.



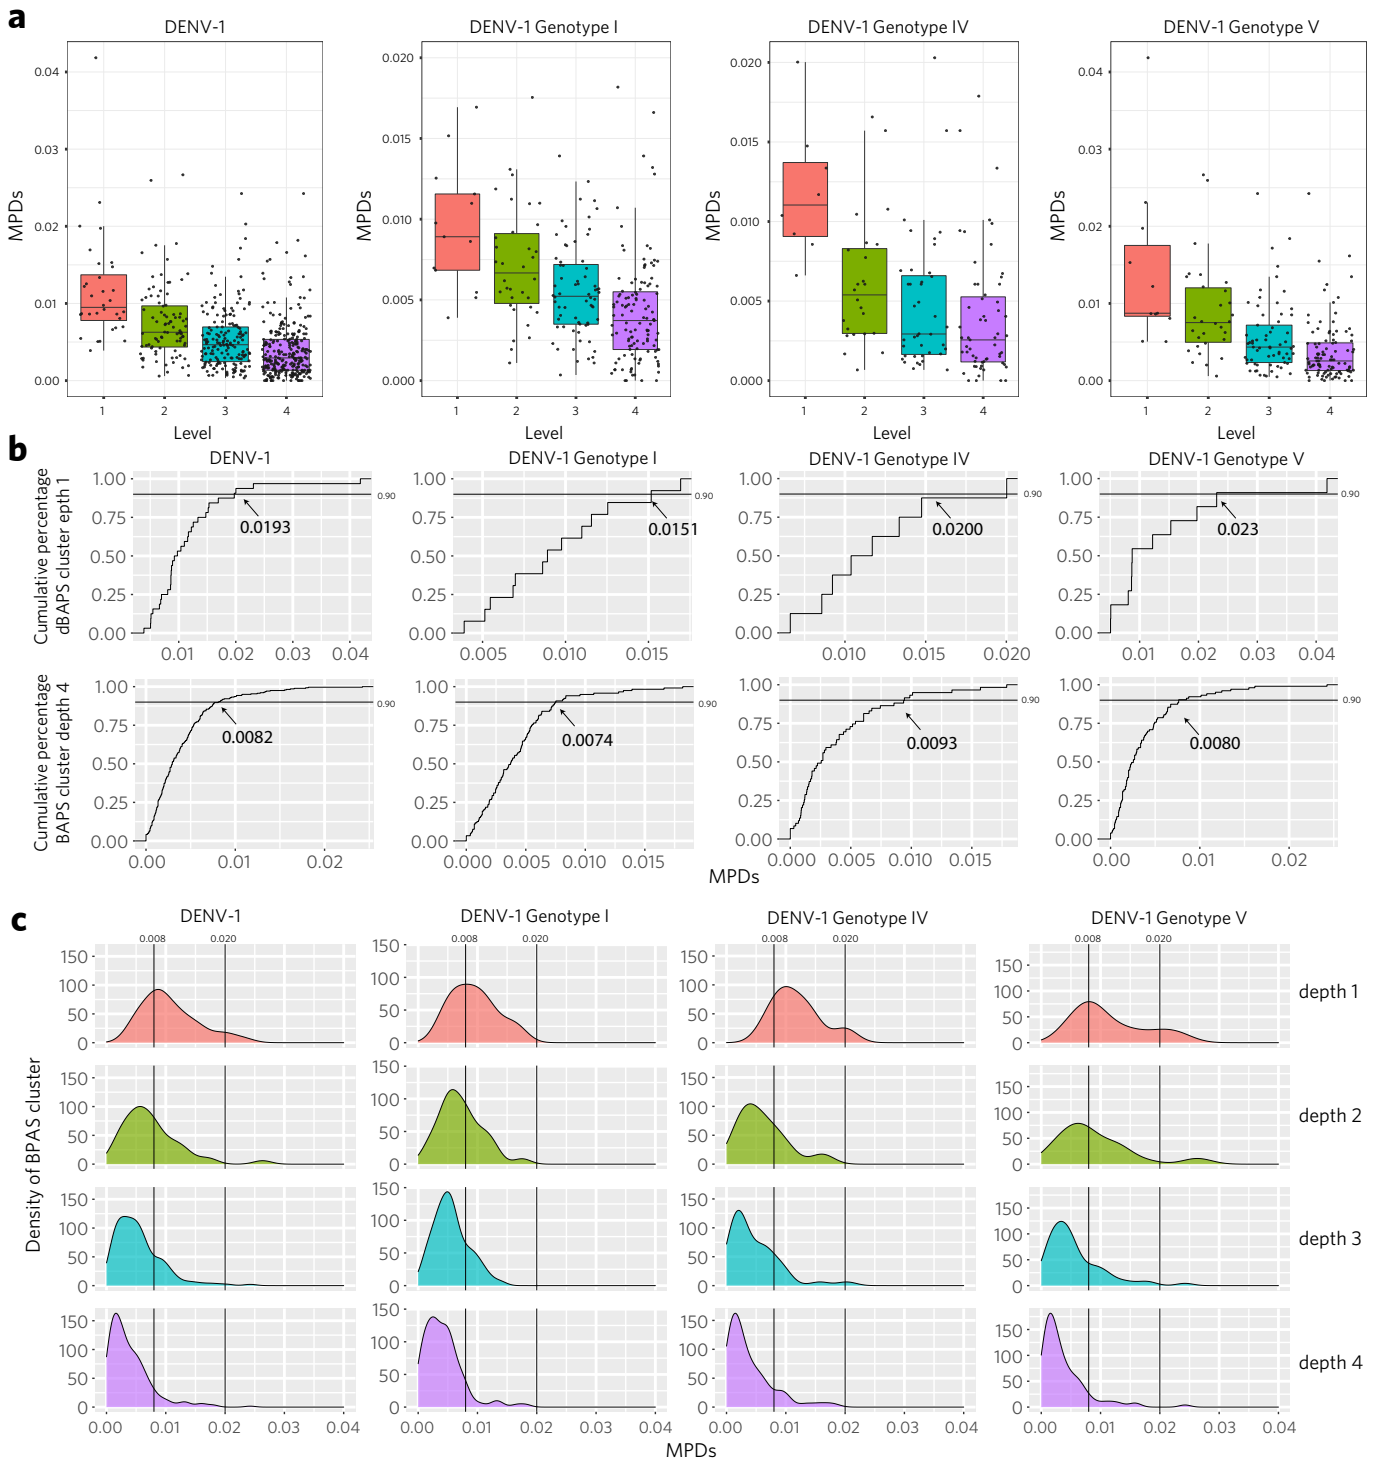

**Additional file 1 Fig. S B2 Characteristics of MPDs of BAPS raw clusters. a**, MPDs distributions of raw clusters in BAPS hierarchical clustering levels 1-4 for DENV-1 and its genotypes I, IV, and V clustering. **b**, Cumulative distribution plot of MPDs of raw clusters in BAPS levels 1 and 4. MPDs of the majority (90%) of BAPS clusters generated from depth level 1 were below 0.02, and from depth level 4 below 0.008. **c**, Density distributions of MPDs of raw clusters in BAPS levels 1-4 for DENV-1 as well as its genotypes I, IV, and V.

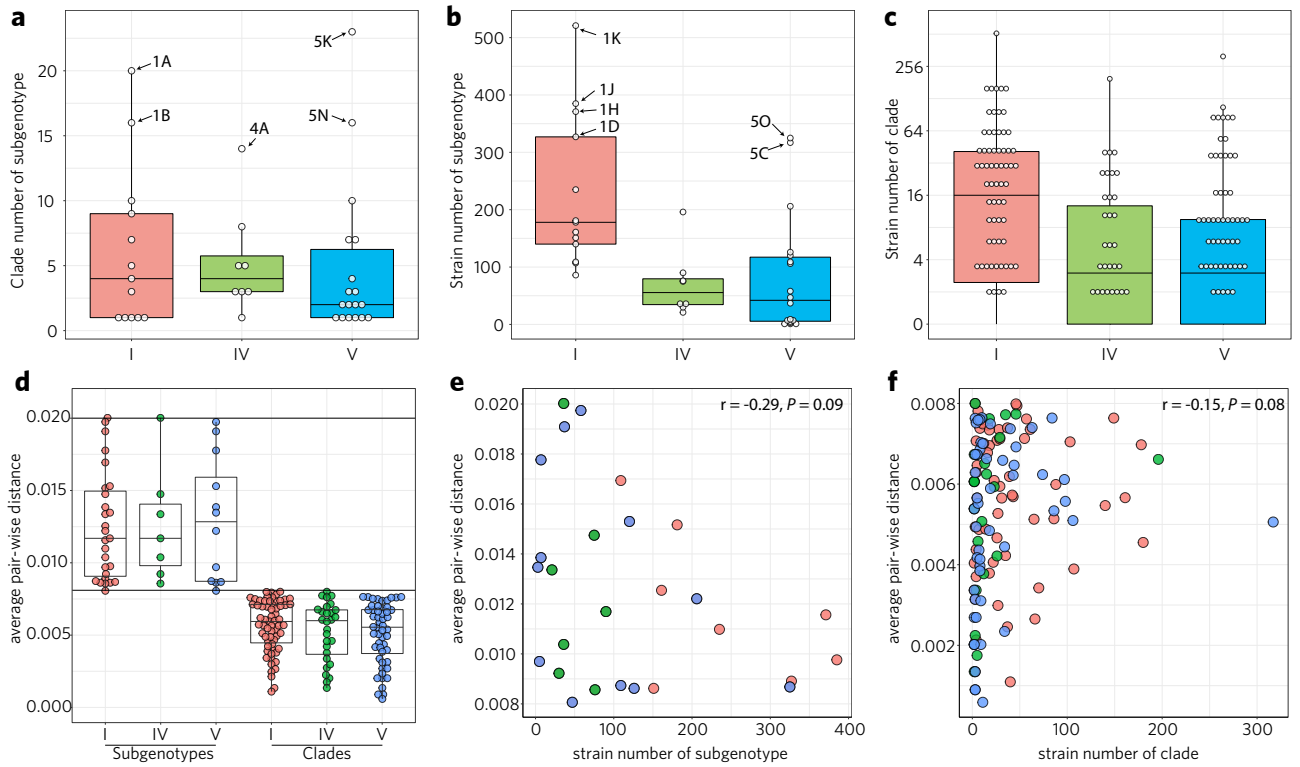

**Additional file 1 Fig. S B3 Demography of DENV-1 subgenotypes and clades.** **a,b**, Demography of DENV-1 subgenotypes. There were  $6.08 \pm 4.86$ ,  $5.25 \pm 2.88$ , and  $4.83 \pm 4.31$  clades in genotype I, IV, and V, respectively. Five of the subgenotypes represent more abundant clades, 5K with 23, 1A with 20, 1B and 5N with 16, and 4A with 13. There were  $227.08 \pm 133.11$ ,  $70.00 \pm 56.88$ , and  $82.50 \pm 104.77$  strains in each subgenotype in genotype I, IV, and V, respectively. More abundant strains were found in subgenotypes 1E1 (348) and 5C1 (317). **c**, Demography of DENV-1 clades. There were  $37.37 \pm 38.53$ ,  $13.33 \pm 15.22$ , and  $17.07 \pm 21.76$  strains in each clade in genotype I, IV, and V, respectively. **d**, Distribution of the mean pairwise distance (MPDs) within subgenotypes and clades in genotypes I, IV, and V of DENV-1. MPDs within genotypes I, IV, and V were  $2.3 \times 10^{-2}$ ,  $4.3 \times 10^{-2}$ , and  $3.6 \times 10^{-2}$ , respectively. **Left panel**: Subgenotypes. MPDs of all 39 subgenotypes were below  $1.17 \times 10^{-2}$ . MPDs of subgenotypes in genotype I, IV, and V were  $1.13 \times 10^{-2}$ ,  $1.17 \times 10^{-2}$ , and  $1.28 \times 10^{-2}$ , respectively. Among them, nine subgenotypes with single clade were resulted in lower MPDs than  $0.8 \times 10^{-2}$ , which were not showed in the boxplots. **Right panel**: Clades. MPDs of all 208 clades were below  $0.8 \times 10^{-2}$ . MPDs of clades in genotype I, IV, and V are  $0.57 \times 10^{-2}$ ,  $0.49 \times 10^{-2}$ , and  $0.51 \times 10^{-2}$ , respectively. The values of MPDs in details showed in **Table S B1-B2, C1-C2**. **e-f**, No significant correlation between the designated subgenotypes, clades and their values of MPDs, which were assessed using Spearman's rank correlation coefficient method.

**Additional file 1 Table S B1 Summary of characteristics of the designated subgenotypes in genotype I, IV, and V of DENV-1**

| Genotype                             | I                 | IV                | V                 | Total             |
|--------------------------------------|-------------------|-------------------|-------------------|-------------------|
| Subgenotype rank structure           |                   |                   |                   |                   |
| means of clades in subgenotypes      | 6.08 ± 4.86       | 5.25 ± 2.88       | 4.83 ± 4.31       | 5.33 ± 4.26       |
| means of strains in subgenotypes     | 227.08 ± 133.11   | 70.00 ± 56.88     | 82.50 ± 104.77    | 128.13 ± 97.45    |
| BAPS clustering support <sup>a</sup> |                   |                   |                   |                   |
| depth 1                              | 13/13 (100%)      | 8/8 (100%)        | 9/18 (50%)        | 30/39 (76.9%)     |
| depth 2                              | 0                 | 0                 | 5/18 (27.8%)      | 5/39 (15.4%)      |
| depth 3                              | 0                 | 0                 | 2/18 (11.1%)      | 2/39 (10.3%)      |
| UFBoot values support                |                   |                   |                   |                   |
| >90                                  | 9/13(69.2%)       | 8/8(100%)         | 13/18(72.2%)      | 30/39(76.9%)      |
| 70-90                                | 0                 | 0                 | 2/18(11.1%)       | 2/39(5.1%)        |
| <70                                  | 4/13(30.8%)       | 0                 | 3/18(16.7%)       | 7/39(17.9%)       |
| Means of MPDs <sup>b</sup>           | 1.13 [0.86, 1.69] | 1.17 [0.86, 2.00] | 1.28 [0.81, 1.97] | 1.17 [0.81, 2.00] |
| Geographical diversity               |                   |                   |                   |                   |
| SWI                                  | 0.92 ± 0.51       | 0.99 ± 0.40       | 0.97 ± 0.55       | 0.96 ± 0.49       |
| SI                                   | 0.43 ± 0.23       | 0.47 ± 0.18       | 0.48 ± 0.21       | 0.46 ± 0.22       |

<sup>a</sup> If the DENV-1 strain in a designated subgenotype was exactly consistent with the BAPS cluster at a certain depth, the subgenotype was counted into the BAPS cluster support at that depth. If a subgenotype can be identified at more than one depth in the BAPS cluster, it was then included in the shallowest depth.

<sup>b</sup> Thirteen singletons out of 39 subgenotypes with only one clade were not counted.

MPDs: Mean pairwise distances; SWI: Shannon-Wiener index; SI: Simpson index; UFBoot value: Ultrafast Bootstrap value

**Additional file 1 Table S B2 Summary of characteristics of the designated clades in genotype I, IV, and V of DENV-1**

| Genotype                                   | I                 | IV                | V                 | Total             |
|--------------------------------------------|-------------------|-------------------|-------------------|-------------------|
| Clade rank structure                       |                   |                   |                   |                   |
| means of strains of clades in subgenotypes | 37.37 ± 38.53     | 13.33 ± 15.22     | 17.07 ± 21.76     | 24.02 ± 28.36     |
| BAPS clustering support <sup>a</sup>       |                   |                   |                   |                   |
| depth 1                                    | 6/77 (7.8%)       | 1/42 (2.4%)       | 1/87 (1.5%)       | 8/208 (3.8%)      |
| depth 2                                    | 14/77 (18.2%)     | 11/42 (26.2%)     | 16/87 (18.4%)     | 41/208 (19.7%)    |
| depth 3                                    | 17/77 (22.1%)     | 9/42 (21.4%)      | 21/87 (24.1%)     | 47/208 (22.6%)    |
| depth 4                                    | 25/77 (32.5%)     | 7/42 (16.7%)      | 18/87 (20.7%)     | 50/208 (24.0%)    |
| UFBoot values support                      |                   |                   |                   |                   |
| >90                                        | 25/79 (31.7%)     | 32/42 (76.2%)     | 55/87 (63.2%)     | 112/208 (53.8%)   |
| 70-90                                      | 14/79 (17.7%)     | 1/42 (2.4%)       | 14/87 (16.1%)     | 29/208 (13.9%)    |
| <70                                        | 19/79 (%)         | 9/42 (21.4%)      | 18/87 (20.7%)     | 46/208 (22.1%)    |
| Means of MPDs <sup>b</sup>                 | 0.59 [0.11, 0.80] | 0.57 [0.13, 0.80] | 0.55 [0.06, 0.76] | 0.57 [0.06, 0.80] |
| Geographical diversity                     |                   |                   |                   |                   |
| SWI                                        | 0.42 ± 0.42       | 0.32 ± 0.38       | 0.32 ± 0.40       | 0.36 ± 0.41       |
| SI                                         | 0.22 ± 0.23       | 0.17 ± 0.20       | 0.19 ± 0.23       | 0.20 ± 0.23       |

<sup>a</sup> If the DENV-1 strain in a designated clade was exactly consistent with the BAPS cluster at a certain depth, the clade was counted into the BAPS cluster support at that depth. If a clade can be identified at more than one depth in the BAPS cluster, it was then included in the shallowest depth.

<sup>b</sup> Sixty-three singletons out of 208 clades with only one strain were not counted.

MPDs: Mean pairwise distances; SWI: Shannon-Wiener index; SI: Simpson index; UFBoot value: Ultrafast Bootstrap value

## C. Ancestral state reconstruction and molecular clock phylogenetic analyses

**Additional file 1 Table S C1 Characteristics of each designated subgenotype in genotype I, IV, and V of DENV-1 worldwide**

| Subgenotype | No. of clades | No. of strains | Year <sub>first</sub> | Year <sub>latest</sub> | PS <sub>observed</sub> | MPD    | SWI  | SI   | UFBoot | r    | Substitution rate (10 <sup>-4</sup> ) | tMRCA                      |
|-------------|---------------|----------------|-----------------------|------------------------|------------------------|--------|------|------|--------|------|---------------------------------------|----------------------------|
| 1A          | 20            | 109            | 1944                  | 2011                   | 68                     | 0.1694 | 1.43 | 0.68 | 100    | 0.9  | 10.66 [8.81, 12.45]                   | 1940.79 [1930.03, 1944.00] |
| 1B          | 16            | 181            | 1990                  | 2011                   | 22                     | 0.0156 | 1.09 | 0.51 | 100    | 0.72 | 9.30 [7.76, 10.94]                    | 1980.55 [1972.63, 1985.94] |
| 1C          | 1             | 178            | 2002                  | 2011                   | 10                     | 0.007  | 0.07 | 0.02 | 84     | 0.83 | 10.53 [8.72, 12.37]                   | 2001.97 [2001.65, 2002.00] |
| 1D          | 4             | 327            | 1998                  | 2012                   | 15                     | 0.0089 | 0.43 | 0.18 | 100    | 0.62 | 9.50 [7.90, 11.11]                    | 1993.67 [1989.20, 1996.50] |
| 1E          | 1             | 521            | 2001                  | 2016                   | 16                     | 0.0068 | 0.41 | 0.15 | 38     | 0.77 | 11.96 [10.36, 13.69]                  | 1999.41 [1996.53, 2001.00] |
| 1F          | 1             | 140            | 2003                  | 2013                   | 11                     | 0.0055 | 1.07 | 0.58 | 20     | 0.63 | 12.17 [9.66, 15.05]                   | 2002.51 [2000.40, 2003.00] |
| 1G          | 10            | 235            | 1999                  | 2015                   | 17                     | 0.011  | 0.51 | 0.26 | 100    | 0.66 | 7.49 [5.82, 9.37]                     | 1993.05 [1988.97, 1995.87] |
| 1H          | 5             | 371            | 2001                  | 2015                   | 15                     | 0.0116 | 1.92 | 0.81 | 66     | 0.66 | 12.94 [11.10, 14.83]                  | 1999.25 [1997.46, 2000.36] |
| 1I          | 1             | 86             | 2000                  | 2009                   | 10                     | 0.0051 | 0.34 | 0.19 | 98     | 0.86 | 12.71 [9.12, 16.65]                   | 1998.37 [1992.81, 2000.00] |
| 1J          | 7             | 385            | 2002                  | 2015                   | 14                     | 0.0098 | 1.96 | 0.83 | 98     | 0.76 | 11.90 [10.31, 13.50]                  | 1999.84 [1997.59, 2001.37] |
| 1K          | 1             | 107            | 2006                  | 2015                   | 10                     | 0.0039 | 0.58 | 0.19 | 98     | 0.64 | 14.58 [7.49, 22.57]                   | 2004.14 [1996.14, 2006.00] |
| 1L          | 3             | 151            | 2008                  | 2017                   | 10                     | 0.0086 | 1.35 | 0.27 | 41     | 0.5  | 10.37 [7.89, 12.90]                   | 2004.02 [2000.17, 2006.52] |
| 1M          | 9             | 161            | 2005                  | 2015                   | 11                     | 0.0125 | 0.75 | 0.41 | 94     | 0.7  | 11.67 [9.25, 14.55]                   | 2003.11 [2000.37, 2004.85] |
| 4A          | 14            | 75             | 1973                  | 2016                   | 44                     | 0.1474 | 0.7  | 0.29 | 97     | 0.91 | 9.40 [6.92, 12.05]                    | 1967.48 [1960.82, 1971.71] |
| 4B          | 3             | 36             | 2003                  | 2013                   | 11                     | 0.0104 | 0.38 | 0.16 | 97     | 0.83 | 9.77 [6.75, 13.09]                    | 1999.98 [1996.42, 2002.40] |
| 4C          | 3             | 76             | 2007                  | 2016                   | 10                     | 0.0086 | 0.58 | 0.26 | 100    | 0.43 | 11.93 [7.25, 16.13]                   | 2006.72 [2004.56, 2007.00] |
| 4D          | 3             | 30             | 1983                  | 2010                   | 28                     | 0.0092 | 0.76 | 0.43 | 100    | 0.96 | 11.84 [8.07, 15.91]                   | 1980.63 [1977.12, 1982.78] |
| 4E          | 8             | 90             | 1993                  | 2013                   | 21                     | 0.0117 | 0.94 | 0.48 | 100    | 0.67 | 4.44 [3.01, 6.14]                     | 1984.84 [1973.81, 1991.06] |
| 4F          | 5             | 36             | 1988                  | 2011                   | 24                     | 0.02   | 1.65 | 0.78 | 100    | 0.94 | 9.98 [6.11, 15.04]                    | 1978.41 [1969.60, 1987.56] |
| 4G          | 5             | 21             | 2002                  | 2016                   | 15                     | 0.0133 | 1.39 | 0.67 | 100    | 0.96 | 11.41 [6.30, 17.59]                   | 1999.04 [1993.05, 2001.76] |
| 4H          | 1             | 196            | 1998                  | 2014                   | 17                     | 0.0066 | 1.53 | 0.69 | 99     | 0.94 | 9.81 [7.11, 13.17]                    | 1994.95 [1989.70, 1997.99] |
| 5A          | 3             | 7              | 1956                  | 2014                   | 59                     | 0.0178 | 0.96 | 0.58 | 100    | /    | /                                     | /                          |
| 5B          | 7             | 37             | 1962                  | 2015                   | 54                     | 0.0191 | 1.88 | 0.82 | 100    | 0.96 | 0.03 [91.55, 466.00]                  | 1961.04 [1955.37, 1962.00] |
| 5C          | 1             | 317            | 2004                  | 2016                   | 13                     | 0.0051 | 1.5  | 0.72 | 100    | 0.61 | 13.17 [9.94, 16.95]                   | 2000.08 [1994.57, 2003.72] |
| 5K          | 23            | 58             | 1962                  | 2014                   | 53                     | 0.0197 | 2.59 | 0.9  | 99     | 0.7  | 5.37 [4.23, 6.51]                     | 1950.38 [1938.01, 1958.20] |
| 5L          | 3             | 126            | 1985                  | 2016                   | 32                     | 0.0086 | 0.74 | 0.48 | 100    | 0.86 | 7.49 [5.90, 9.12]                     | 1984.74 [1982.94, 1985.00] |
| 5M          | 7             | 47             | 1987                  | 2003                   | 17                     | 0.0806 | 1.22 | 0.62 | 98     | 0.71 | 5.65 [3.59, 7.87]                     | 1980.58 [1968.21, 1986.01] |
| 5N          | 16            | 120            | 1986                  | 2014                   | 29                     | 0.0152 | 1.72 | 0.73 | 100    | 0.87 | 7.75 [6.34, 9.23]                     | 1983.70 [1981.07, 1985.26] |
| 5O          | 4             | 325            | 2004                  | 2016                   | 13                     | 0.0087 | 1.03 | 0.49 | 62     | 0.74 | 11.28 [9.29, 13.54]                   | 2002.60 [2000.96, 2003.64] |
| 5P          | 10            | 206            | 1994                  | 2016                   | 23                     | 0.0122 | 1.06 | 0.52 | 100    | 0.72 | 8.10 [6.64, 9.73]                     | 1991.38 [1986.77, 1994.00] |
| 5Q          | 2             | 109            | 1997                  | 2014                   | 18                     | 0.0087 | 1.32 | 0.62 | 100    | 0.74 | 4.74 [3.19, 6.28]                     | 1989.00 [1978.55, 1999.01] |
| 5R          | 1             | 106            | 2009                  | 2016                   | 8                      | 0.0051 | 0.99 | 0.57 | 100    | 0.74 | 16.59 [12.10, 21.89]                  | 2008.41 [2007.79, 2008.80] |
| 5D          | 2             | 7              | 1971                  | 1998                   | 28                     | 0.0139 | 0    | 0    | 100    | /    | /                                     | /                          |
| 5E          | 1             | 1              | 1968                  | 1968                   | 1                      | /      | 0    | 0    | 78     | /    | /                                     | /                          |
| 5F          | 1             | 1              | 1985                  | 1985                   | 1                      | /      | 0    | 0    | 34     | /    | /                                     | /                          |
| 5G          | 1             | 1              | 1999                  | 1999                   | 1                      | /      | 0    | 0    | 100    | /    | /                                     | /                          |
| 5H          | 2             | 5              | 1970                  | 2014                   | 45                     | 0.0097 | 0.67 | 0.48 | 100    | /    | /                                     | /                          |
| 5I          | 1             | 9              | 2013                  | 2013                   | 1                      | 0.002  | 0.69 | 0.49 | 34     | /    | /                                     | /                          |
| 5J          | 2             | 3              | 1977                  | 1985                   | 9                      | 0.0135 | 1.1  | 0.67 | 97     | /    | /                                     | /                          |

Year<sub>first</sub>: the year recorded the first strain of the subgenotype; Year<sub>latest</sub>: the year recorded the latest strain of the subgenotype; PS<sub>observed</sub>: Year<sub>latest</sub>-Year<sub>first</sub>; MPD: Mean pairwise distance; SWI: Shannon-Wiener index; SI: Simpson index; UFBoot: Ultrafast Bootstrap value; tMRCA: the most recent common ancestor

**Additional file 1 Table S C2 Characteristics of each designated clade in genotype I, IV, and V of DENV-1 worldwide**

| Clade | No. of strains | Year <sub>first</sub> | Year <sub>latest</sub> | PSobserved | MPD    | SWI  | SI   | UFBoot | r     | Substitution rate (10 <sup>-4</sup> ) | tMRCA                      |
|-------|----------------|-----------------------|------------------------|------------|--------|------|------|--------|-------|---------------------------------------|----------------------------|
| 1A7   | 26             | 1999                  | 2002                   | 4          | 0.0047 | 0    | 0    | 100    | 0.34  | 4.90 [0, 38.17]                       | 1995.51 [1938.57, 1999.00] |
| 1A12  | 28             | 1986                  | 1995                   | 10         | 0.0074 | 0.26 | 0.13 | 100    | 0.76  | 11.33 [7.06, 16.04]                   | 1985.20 [1981.54, 1986.00] |
| 1B8   | 27             | 2001                  | 2007                   | 7          | 0.0053 | 0.16 | 0.07 | 100    | 0.72  | 4.16 [0.43, 10.47]                    | 1995.45 [1970.54, 2001.00] |
| 1B9   | 66             | 2006                  | 2010                   | 5          | 0.0027 | 0.16 | 0.06 | 79     | 0.78  | 28.86 [14.28, 47.65]                  | 2005.91 [2005.51, 2006.00] |
| 1B12  | 26             | 1991                  | 2001                   | 11         | 0.0071 | 0.77 | 0.39 | 98     | 0.46  | 2.89 [0.01, 6.89]                     | 1982.44 [1897.22, 1991.00] |
| 1C1   | 178            | 2002                  | 2011                   | 10         | 0.007  | 0.07 | 0.02 | 84     | 0.83  | 10.53 [8.72, 12.37]                   | 2001.97 [2001.65, 2002.00] |
| 1D1   | 29             | 1999                  | 2008                   | 10         | 0.0059 | 1.09 | 0.56 | 100    | 0.96  | 12.68 [8.34, 17.50]                   | 1998.72 [1997.49, 1999.00] |
| 1D2   | 61             | 2006                  | 2012                   | 7          | 0.0074 | 0    | 0    | 84     | 0.56  | 8.31 [5.30, 11.94]                    | 2000.50 [1995.54, 2003.79] |
| 1D3   | 57             | 2002                  | 2011                   | 10         | 0.0076 | 0.24 | 0.1  | 84     | 0.75  | 13.44 [9.21, 18.23]                   | 2001.40 [1999.28, 2002.00] |
| 1D4   | 180            | 1998                  | 2009                   | 12         | 0.0046 | 0.07 | 0.02 | 50     | 0.39  | 8.68 [6.38, 10.97]                    | 1997.73 [1996.44, 1998.00] |
| 1E1   | 521            | 2001                  | 2016                   | 16         | 0.0068 | 0.41 | 0.15 | 38     | 0.77  | 11.96 [10.36, 13.69]                  | 1999.41 [1996.53, 2001.00] |
| 1F1   | 140            | 2003                  | 2013                   | 11         | 0.0055 | 10.7 | 0.58 | 20     | 0.63  | 12.17 [9.66, 15.05]                   | 2002.51 [2000.40, 2003.00] |
| 1G1   | 31             | 2001                  | 2008                   | 8          | 0.0057 | 0.53 | 0.35 | 100    | 0.62  | 7.54 [0.19, 16.17]                    | 1996.18 [1981.35, 2000.61] |
| 1G9   | 47             | 2000                  | 2002                   | 3          | 0.0079 | 0    | 0    | 44     | 0.55  | 33.14 [21.47, 48.68]                  | 1999.38 [1998.73, 1999.79] |
| 1G10  | 88             | 2001                  | 2002                   | 2          | 0.006  | 0    | 0    | 59     | -0.11 | 1.12 [0, 4.33]                        | 1969.15 [1623.35, 1998.36] |
| 1H1   | 55             | 2001                  | 2011                   | 11         | 0.0071 | 1.02 | 0.52 | 66     | 0.82  | 9.48 [7.23, 11.95]                    | 1998.88 [1996.51, 2000.31] |
| 1H2   | 27             | 2005                  | 2008                   | 4          | 0.003  | 0.32 | 0.14 | 100    | 0.79  | 14.84 [4.40, 29.25]                   | 2003.97 [1997.86, 2005.00] |
| 1H3   | 37             | 2007                  | 2011                   | 5          | 0.0025 | 0.61 | 0.29 | 75     | 0.65  | 8.08 [2.80, 14.43]                    | 2004.98 [1999.13, 2007.00] |
| 1H4   | 103            | 2006                  | 2015                   | 10         | 0.007  | 1.05 | 0.62 | 100    | 0.81  | 12.20 [8.77, 16.00]                   | 2004.88 [2003.28, 2005.70] |
| 1H5   | 149            | 2006                  | 2015                   | 10         | 0.0076 | 1.64 | 0.73 | 100    | 0.46  | 15.01 [11.94, 18.65]                  | 2005.65 [2004.77, 2005.99] |
| 1I1   | 86             | 2000                  | 2009                   | 10         | 0.0051 | 0.34 | 0.19 | 98     | 0.86  | 12.71 [9.12, 16.65]                   | 1998.37 [1992.81, 2000.00] |
| 1J1   | 29             | 2004                  | 2010                   | 7          | 0.0071 | 1.5  | 0.72 | 98     | 0.83  | 12.06 [2.69, 22.12]                   | 2001.78 [1999.15, 2003.54] |
| 1J2   | 22             | 2007                  | 2013                   | 7          | 0.0041 | 1.05 | 0.54 | 100    | 0.78  | 9.01 [4.85, 13.97]                    | 2006.69 [2004.84, 2006.99] |
| 1J3   | 23             | 2007                  | 2014                   | 8          | 0.0061 | 1.11 | 0.54 | 39     | 0.85  | 12.27 [6.76, 18.56]                   | 2006.70 [2005.13, 2007.00] |
| 1J4   | 37             | 2005                  | 2014                   | 10         | 0.0074 | 1.34 | 0.71 | 15     | 0.72  | 18.81 [13.00, 25.51]                  | 2004.64 [2003.39, 2005.00] |
| 1J5   | 43             | 2008                  | 2013                   | 6          | 0.0057 | 0.72 | 0.42 | 100    | 0.92  | 9.96 [3.12, 17.87]                    | 2004.46 [1993.90, 2007.80] |
| 1J6   | 161            | 2002                  | 2015                   | 14         | 0.0057 | 1.35 | 0.62 | 93     | 0.82  | 10.84 [8.57, 13.36]                   | 1999.70 [1996.88, 2001.29] |
| 1J7   | 70             | 2010                  | 2015                   | 6          | 0.0034 | 1.67 | 0.77 | 53     | 0.5   | 8.37 [5.57, 11.60]                    | 2008.11 [2005.20, 2009.99] |
| 1K1   | 107            | 2006                  | 2015                   | 10         | 0.0039 | 0.58 | 0.27 | 98     | 0.64  | 14.58 [7.49, 22.57]                   | 2004.14 [1996.14, 2006.00] |
| 1L1   | 46             | 2008                  | 2017                   | 10         | 0.008  | 1.35 | 0.67 | 100    | 0.56  | 9.50 [6.31, 13.29]                    | 2003.58 [1998.97, 2006.88] |
| 1L2   | 65             | 2008                  | 2016                   | 9          | 0.0051 | 1.36 | 0.72 | 41     | 0.32  | 10.21 [6.81, 13.90]                   | 2005.59 [2003.43, 2007.05] |
| 1L3   | 40             | 2013                  | 2015                   | 3          | 0.0011 | 0.85 | 0.49 | 97     | 0.03  | 7.29 [0, 22.10]                       | 2012.02 [1895.71, 2013.00] |
| 1M1   | 39             | 2005                  | 2015                   | 11         | 0.0062 | 0.32 | 0.14 | 28     | 0.91  | 11.45 [8.05, 15.87]                   | 2004.41 [2003.30, 2004.94] |
| 1M8   | 35             | 2008                  | 2015                   | 8          | 0.0042 | 0.62 | 0.36 | 50     | 0.93  | 13.87 [7.35, 24.57]                   | 2006.47 [2003.95, 2007.94] |
| 1M9   | 42             | 2014                  | 2015                   | 2          | 0.0057 | 0    | 0    | 20     | 0.27  | 2.69 [0, 8.69]                        | 1998.01 [1807.39, 2013.31] |
| 1A1   | 1              | 1944                  | 1944                   | 1          | /      | 0    | 0    | 100    | /     | /                                     | /                          |
| 1A2   | 16             | 1980                  | 1998                   | 19         | 0.0075 | 0.67 | 0.49 | 73     | /     | /                                     | /                          |
| 1A3   | 5              | 1979                  | 1983                   | 5          | 0.0065 | 0.67 | 0.48 | 100    | /     | /                                     | /                          |
| 1A4   | 8              | 1989                  | 1994                   | 6          | 0.0074 | 0    | 0    | 100    | /     | /                                     | /                          |
| 1A5   | 1              | 1996                  | 1996                   | 1          | /      | 0    | 0    | 81     | /     | /                                     | /                          |
| 1A6   | 1              | 1992                  | 1992                   | 1          | /      | 0    | 0    | 77     | /     | /                                     | /                          |
| 1A8   | 4              | 1998                  | 2001                   | 4          | 0.0063 | 0    | 0    | 82     | /     | /                                     | /                          |
| 1A9   | 1              | 1987                  | 1987                   | 1          | /      | 0    | 0    | 100    | /     | /                                     | /                          |
| 1A10  | 1              | 1989                  | 1989                   | 1          | /      | 0    | 0    | 100    | /     | /                                     | /                          |
| 1A11  | 3              | 1985                  | 1990                   | 6          | 0.0049 | 0    | 0    | 100    | /     | /                                     | /                          |
| 1A13  | 3              | 2004                  | 2006                   | 3          | 0.0031 | 0    | 0    | 100    | /     | /                                     | /                          |
| 1A14  | 3              | 2005                  | 2011                   | 7          | 0.0013 | 0    | 0    | 96     | /     | /                                     | /                          |
| 1A15  | 3              | 2011                  | 2011                   | 1          | 0.008  | 0    | 0    | 67     | /     | /                                     | /                          |
| 1A16  | 1              | 2011                  | 2011                   | 1          | /      | 0    | 0    | 100    | /     | /                                     | /                          |
| 1A17  | 1              | 2011                  | 2011                   | 1          | /      | 0    | 0    | 67     | /     | /                                     | /                          |
| 1A18  | 1              | 2004                  | 2004                   | 1          | /      | 0    | 0    | 100    | /     | /                                     | /                          |
| 1A19  | 1              | 2010                  | 2010                   | 1          | /      | 0    | 0    | 100    | /     | /                                     | /                          |
| 1A20  | 1              | 1998                  | 1998                   | 1          | /      | 0    | 0    | 100    | /     | /                                     | /                          |
| 1B1   | 10             | 1990                  | 1996                   | 7          | 0.0075 | 0.33 | 0.18 | 100    | /     | /                                     | /                          |
| 1B2   | 2              | 1997                  | 1997                   | 1          | 0.0054 | 0    | 0    | 99     | /     | /                                     | /                          |
| 1B3   | 2              | 1999                  | 2000                   | 2          | 0.004  | 0    | 0    | 100    | /     | /                                     | /                          |
| 1B4   | 11             | 1993                  | 2004                   | 12         | 0.0076 | 0    | 0    | 99     | /     | /                                     | /                          |
| 1B5   | 2              | 1997                  | 1998                   | 2          | 0.0034 | 0    | 0    | 100    | /     | /                                     | /                          |
| 1B6   | 6              | 2000                  | 2003                   | 4          | 0.0078 | 0.87 | 0.5  | 85     | /     | /                                     | /                          |
| 1B7   | 5              | 2001                  | 2004                   | 4          | 0.0057 | 0.5  | 0.32 | 77     | /     | /                                     | /                          |
| 1B10  | 1              | 1994                  | 1994                   | 1          | /      | 0    | 0    | 100    | /     | /                                     | /                          |
| 1B11  | 1              | 1998                  | 1998                   | 1          | /      | 0    | 0    | 100    | /     | /                                     | /                          |
| 1B13  | 2              | 2000                  | 2011                   | 12         | 0.0061 | 0.69 | 0.5  | 95     | /     | /                                     | /                          |
| 1B14  | 1              | 1998                  | 1998                   | 1          | /      | 0    | 0    | 100    | /     | /                                     | /                          |
| 1B15  | 1              | 1997                  | 1997                   | 1          | /      | 0    | 0    | 100    | /     | /                                     | /                          |
| 1B16  | 18             | 1994                  | 2009                   | 16         | 0.007  | 0.93 | 0.5  | 94     | /     | /                                     | /                          |
| 1G2   | 12             | 2014                  | 2015                   | 2          | 0.007  | 0.45 | 0.28 | 100    | /     | /                                     | /                          |
| 1G3   | 4              | 2007                  | 2015                   | 9          | 0.0044 | 0.56 | 0.38 | 100    | /     | /                                     | /                          |
| 1G4   | 4              | 2011                  | 2015                   | 5          | 0.0037 | 0.56 | 0.38 | 100    | /     | /                                     | /                          |

|      |     |      |      |    |        |      |      |     |      |                      |                            |
|------|-----|------|------|----|--------|------|------|-----|------|----------------------|----------------------------|
| 1G5  | 18  | 2009 | 2015 | 7  | 0.0073 | 0.98 | 0.59 | 95  | /    | /                    | /                          |
| 1G6  | 11  | 2001 | 2001 | 1  | 0.0075 | 0    | 0    | 82  | /    | /                    | /                          |
| 1G7  | 4   | 1999 | 2001 | 3  | 0.0071 | 0    | 0    | 18  | /    | /                    | /                          |
| 1G8  | 16  | 2001 | 2001 | 1  | 0.0068 | 0    | 0    | 82  | /    | /                    | /                          |
| 1M2  | 18  | 2007 | 2012 | 6  | 0.0038 | 0.21 | 0.1  | 17  | /    | /                    | /                          |
| 1M3  | 7   | 2009 | 2014 | 6  | 0.0049 | 1.15 | 0.61 | 100 | /    | /                    | /                          |
| 1M4  | 4   | 2010 | 2010 | 1  | 0.0021 | 0    | 0    | 86  | /    | /                    | /                          |
| 1M5  | 1   | 2015 | 2015 | 1  | /      | 0    | 0    | 24  | /    | /                    | /                          |
| 1M6  | 1   | 2013 | 2013 | 1  | /      | 0    | 0    | 24  | /    | /                    | /                          |
| 1M7  | 14  | 2010 | 2013 | 4  | 0.0049 | 0.68 | 0.49 | 100 | /    | /                    | /                          |
| 4A14 | 46  | 2007 | 2016 | 10 | 0.0077 | 0.21 | 0.08 | 100 | 0.72 | 10.88 [6.53, 15.64]  | 2004.43 [1999.93, 2007.00] |
| 4B3  | 29  | 2006 | 2013 | 8  | 0.0072 | 0.45 | 0.19 | 100 |      | 9.31 [4.83, 13.64]   | 2002.71 [1996.43, 2005.57] |
| 4C2  | 23  | 2011 | 2014 | 4  | 0.0059 | 0    | 0    | 7   | 0.52 | 14.27 [5.16, 27.85]  | 2009.18 [2004.78, 2010.97] |
| 4C3  | 35  | 2007 | 2015 | 9  | 0.0077 | 0.56 | 0.26 | 100 | 0.62 | 13.31 [8.69, 18.89]  | 2006.93 [2005.93, 2007.00] |
| 4D3  | 26  | 2000 | 2010 | 11 | 0.0042 | 0.54 | 0.27 | 100 | 0.94 | 13.46 [6.69, 22.06]  | 1999.66 [1997.39, 2000.00] |
| 4E4  | 25  | 1993 | 2007 | 15 | 0.0065 | 0.79 | 0.4  | 66  | 0.52 | 0.85 [0.01, 4.22]    | 1945.74 [1321.38, 1992.99] |
| 4E8  | 40  | 2008 | 2012 | 5  | 0.003  | 0    | 0    | 66  | 0.64 | 10.74 [4.13, 17.17]  | 2006.94 [2001.94, 2007.99] |
| 4H1  | 196 | 1998 | 2014 | 17 | 0.0066 | 1.53 | 0.69 | 99  | 0.94 | 9.81 [7.11, 13.17]   | 1994.95 [1989.70, 1997.99] |
| 4A1  | 1   | 1974 | 1974 | 1  | /      | 0    | 0    | 100 | /    | /                    | /                          |
| 4A2  | 2   | 1973 | 1984 | 12 | 0.0054 | 0.69 | 0.5  | 100 | /    | /                    | /                          |
| 4A3  | 2   | 1991 | 1991 | 1  | 0.002  | 0    | 0    | 100 | /    | /                    | /                          |
| 4A4  | 1   | 1995 | 1995 | 1  | /      | 0    | 0    | 45  | /    | /                    | /                          |
| 4A5  | 1   | 2000 | 2000 | 1  | /      | 0    | 0    | 97  | /    | /                    | /                          |
| 4A6  | 1   | 2002 | 2002 | 1  | /      | 0    | 0    | 56  | /    | /                    | /                          |
| 4A7  | 1   | 2002 | 2002 | 1  | /      | 0    | 0    | 56  | /    | /                    | /                          |
| 4A8  | 1   | 2001 | 2001 | 1  | /      | 0    | 0    | 100 | /    | /                    | /                          |
| 4A9  | 2   | 1999 | 1999 | 1  | 0.0067 | 0    | 0    | 100 | /    | /                    | /                          |
| 4A10 | 13  | 2001 | 2005 | 5  | 0.0065 | 1.16 | 0.63 | 94  | /    | /                    | /                          |
| 4A11 | 1   | 2002 | 2002 | 1  | /      | 0    | 0    | 90  | /    | /                    | /                          |
| 4A12 | 1   | 2008 | 2008 | 1  | /      | 0    | 0    | 99  | /    | /                    | /                          |
| 4A13 | 2   | 2006 | 2006 | 1  | /      | 0    | 0    | 100 | /    | /                    | /                          |
| 4B1  | 3   | 2003 | 2009 | 7  | 0.008  | 0    | 0    | 100 | /    | /                    | /                          |
| 4B2  | 4   | 2012 | 2013 | 2  | 0.0034 | 0    | 0    | 100 | /    | /                    | /                          |
| 4C1  | 18  | 2010 | 2016 | 7  | 0.0076 | 0.85 | 0.49 | 11  |      | /                    | /                          |
| 4D1  | 2   | 1983 | 1983 | 1  | 0.0061 | 0    | 0    | 100 | /    | /                    | /                          |
| 4D2  | 2   | 2007 | 2007 | 1  | 0.0061 | 0    | 0    | 100 | /    | /                    | /                          |
| 4E1  | 9   | 1998 | 2011 | 14 | 0.0068 | 0.68 | 0.37 | 100 | /    | /                    | /                          |
| 4E2  | 1   | 2002 | 2002 | 1  | /      | 0    | 0    | 100 | /    | /                    | /                          |
| 4E3  | 1   | 2010 | 2010 | 1  | /      | 0    | 0    | 66  | /    | /                    | /                          |
| 4E5  | 4   | 2002 | 2005 | 4  | 0.0046 | 0    | 0    | 81  | /    | /                    | /                          |
| 4E6  | 4   | 2010 | 2013 | 4  | 0.007  | 1.04 | 0.63 | 65  | /    | /                    | /                          |
| 4E7  | 6   | 2008 | 2010 | 3  | 0.0027 | 0.45 | 0.28 | 100 | /    | /                    | /                          |
| 4F1  | 1   | 1988 | 1988 | 1  | /      | 0    | 0    | 100 | /    | /                    | /                          |
| 4F2  | 2   | 1988 | 1988 | 1  | /      | 0    | 0    | 100 | /    | /                    | /                          |
| 4F3  | 15  | 2003 | 2009 | 7  | 0.0062 | 1.49 | 0.71 | 90  | /    | /                    | /                          |
| 4F4  | 12  | 1995 | 2004 | 10 | 0.0038 | 0.29 | 0.15 | 100 | /    | /                    | /                          |
| 4F5  | 6   | 2010 | 2011 | 2  | 0.0046 | 0.45 | 0.28 | 100 | /    | /                    | /                          |
| 4G1  | 1   | 2011 | 2011 | 1  | /      | 0    | 0    | 100 | /    | /                    | /                          |
| 4G2  | 3   | 2011 | 2016 | 6  | 0.0022 | 0    | 0    | 100 | /    | /                    | /                          |
| 4G3  | 2   | 2015 | 2015 | 1  | 0.0013 | 0    | 0    | 90  | /    | /                    | /                          |
| 4G4  | 5   | 2012 | 2015 | 4  | 0.0018 | 0.5  | 0.32 | 100 | /    | /                    | /                          |
| 4G5  | 10  | 2002 | 2004 | 3  | 0.0051 | 1.61 | 0.76 | 100 | /    | /                    | /                          |
| 5C1  | 217 | 2004 | 2016 | 13 | 0.0051 | 1.5  | 0.71 | 100 | 0.61 | 13.17 [9.94, 16.95]  | 2000.08 [1994.57, 2003.72] |
| 5L2  | 34  | 2013 | 2016 | 4  | 0.0023 | 0.55 | 0.3  | 21  | 0.64 | 40.80 [11.00, 76.05] | 2012.85 [2012.02, 2013.00] |
| 5L3  | 74  | 2006 | 2016 | 11 | 0.0062 | 0.56 | 0.37 | 79  | 0.55 | 7.47 [5.52, 9.57]    | 2005.39 [2004.11, 2005.98] |
| 5M7  | 34  | 1987 | 2000 | 14 | 0.0044 | 1.05 | 0.6  | 100 | 0.77 | 6.98 [4.24, 10.59]   | 1986.68 [1983.67, 1987.00] |
| 5N7  | 40  | 1991 | 2002 | 12 | 0.0074 | 0    | 0    | 43  | 0.66 | 8.48 [6.10, 11.08]   | 1990.03 [1987.43, 1991.00] |
| 5O1  | 98  | 2004 | 2014 | 11 | 0.0056 | 1.18 | 0.61 | 62  | 0.73 | 10.02 [7.54, 12.68]  | 2002.63 [2001.28, 2003.74] |
| 5O2  | 44  | 2006 | 2016 | 11 | 0.0065 | 1.33 | 0.7  | 100 | 0.68 | 6.33 [3.78, 9.23]    | 2003.37 [1998.23, 2005.93] |
| 5O3  | 97  | 2005 | 2012 | 8  | 0.0061 | 0.26 | 0.12 | 31  | 0.77 | 12.76 [8.44, 17.78]  | 2002.31 [1998.27, 2004.53] |
| 5O4  | 86  | 2007 | 2013 | 7  | 0.0053 | 0.15 | 0.07 | 64  | 0.71 | 11.94 [6.12, 19.15]  | 2004.26 [1998.55, 2006.73] |
| 5P7  | 32  | 2012 | 2014 | 3  | 0.0066 | 0    | 0    | 75  | 0.21 | 5.49 [0, 18.63]      | 2004.53 [1885.30, 2011.96] |
| 5P8  | 43  | 1998 | 2010 | 13 | 0.0062 | 0    | 0    | 74  | 0.51 | 2.55 [0.55, 5.52]    | 1986.72 [1953.96, 1998.00] |
| 5P9  | 84  | 2004 | 2016 | 13 | 0.0076 | 1.35 | 0.7  | 54  | 0.9  | 9.19 [7.04, 11.39]   | 2002.29 [2000.73, 2003.35] |
| 5Q1  | 63  | 1997 | 2013 | 17 | 0.0074 | 1.57 | 0.71 | 100 | 0.64 | 3.64 [1.24, 6.98]    | 1987.81 [1973.82, 1994.98] |
| 5Q2  | 46  | 2010 | 2014 | 5  | 0.0069 | 0.28 | 0.12 | 11  | 0.45 | 3.55 [0.85, 6.68]    | 1995.80 [1960.34, 2007.05] |
| 5R   | 106 | 2009 | 2016 | 8  | 0.0051 | 0.99 | 0.57 | 100 | 0.74 | 16.59 [12.10, 21.88] | 2008.41 [2007.79, 2008.80] |
| 5A1  | 1   | 1956 | 1956 | 1  | /      | 0    | 0    | 100 | /    | /                    | /                          |
| 5A2  | 5   | 2005 | 2014 | 10 | 0.0042 | 0.67 | 0.48 | 99  | /    | /                    | /                          |
| 5A3  | 1   | 2011 | 2011 | 1  | /      | 0    | 0    | 99  | /    | /                    | /                          |
| 5B1  | 1   | 1993 | 1993 | 1  | /      | 0    | 0    | 99  | /    | /                    | /                          |
| 5B2  | 4   | 1993 | 1994 | 2  | 0.0027 | 0.56 | 0.38 | 98  | /    | /                    | /                          |

|      |    |      |      |    |        |      |      |     |   |   |   |
|------|----|------|------|----|--------|------|------|-----|---|---|---|
| 5B3  | 3  | 1982 | 2014 | 33 | 0.0063 | 0.64 | 0.44 | 91  | / | / | / |
| 5B4  | 7  | 1962 | 1983 | 22 | 0.0044 | 0.41 | 0.24 | 100 | / | / | / |
| 5B5  | 9  | 2004 | 2015 | 12 | 0.007  | 1.31 | 0.72 | 100 | / | / | / |
| 5B6  | 2  | 2014 | 2014 | 1  | 0.002  | 0    | 0    | 100 | / | / | / |
| 5B7  | 11 | 2010 | 2010 | 1  | 0.0006 | 0    | 0    | 100 | / | / | / |
| 5D1  | 3  | 1971 | 1976 | 6  | 0.0076 | 0    | 0    | 100 | / | / | / |
| 5D2  | 4  | 1996 | 1998 | 3  | 0.0049 | 0    | 0    | 100 | / | / | / |
| 5E1  | 1  | 1968 | 1968 | 1  | /      | 0    | 0    | 78  | / | / | / |
| 5F1  | 1  | 1985 | 1985 | 1  | /      | 0    | 0    | 34  | / | / | / |
| 5G1  | 1  | 1999 | 1999 | 1  | /      | 0    | 0    | 100 | / | / | / |
| 5H1  | 2  | 1970 | 2014 | 45 | 0.0027 | 0.69 | 0.5  | 100 | / | / | / |
| 5H2  | 3  | 1971 | 2014 | 44 | 0.0009 | 0.54 | 0.44 | 100 | / | / | / |
| 5I1  | 9  | 2013 | 2013 | 1  | 0.002  | 0.69 | 0.44 | 34  | / | / | / |
| 5J1  | 1  | 1977 | 1977 | 1  | /      | 0    | 0    | 100 | / | / | / |
| 5J2  | 2  | 1983 | 1985 | 3  | 0.0054 | 0.69 | 0.5  | 100 | / | / | / |
| 5K1  | 1  | 1962 | 1962 | 1  | /      | 0    | 0    | 94  | / | / | / |
| 5K2  | 1  | 1962 | 1962 | 1  | /      | 0    | 0    | 98  | / | / | / |
| 5K3  | 1  | 1963 | 1963 | 1  | /      | 0    | 0    | 97  | / | / | / |
| 5K4  | 1  | 1963 | 1963 | 1  | /      | 0    | 0    | 97  | / | / | / |
| 5K5  | 2  | 1963 | 2014 | 52 | 0.0034 | 0.69 | 0.5  | 100 | / | / | / |
| 5K6  | 3  | 1963 | 2014 | 52 | 0.0013 | 0.65 | 0.44 | 100 | / | / | / |
| 5K7  | 2  | 2004 | 2004 | 1  | 0.002  | 0    | 0    | 100 | / | / | / |
| 5K8  | 1  | 2005 | 2005 | 1  | /      | 0    | 0    | 100 | / | / | / |
| 5K9  | 1  | 2006 | 2006 | 1  | /      | 0    | 0    | 99  | / | / | / |
| 5K10 | 1  | 2007 | 2007 | 1  | /      | 0    | 0    | 99  | / | / | / |
| 5K11 | 1  | 2014 | 2014 | 1  | /      | 0    | 0    | 100 | / | / | / |
| 5K12 | 19 | 1977 | 2004 | 28 | 0.0075 | 1.68 | 0.73 | 98  | / | / | / |
| 5K13 | 3  | 1982 | 1984 | 3  | 0.0031 | 0    | 0    | 100 | / | / | / |
| 5K14 | 1  | 1986 | 1986 | 1  | /      | 0    | 0    | 100 | / | / | / |
| 5K15 | 1  | 1990 | 1990 | 1  | /      | 0    | 0    | 100 | / | / | / |
| 5K16 | 1  | 1984 | 1984 | 1  | /      | 0    | 0    | 100 | / | / | / |
| 5K17 | 1  | 1978 | 1978 | 1  | /      | 0    | 0    | 90  | / | / | / |
| 5K18 | 1  | 1988 | 1988 | 1  | /      | 0    | 0    | 7   | / | / | / |
| 5K19 | 1  | 1993 | 1993 | 1  | /      | 0    | 0    | 97  | / | / | / |
| 5K20 | 3  | 1993 | 1996 | 4  | 0.0009 | 0.64 | 0.44 | 98  | / | / | / |
| 5K21 | 3  | 1994 | 1995 | 2  | 0.0067 | 0    | 0    | 98  | / | / | / |
| 5K22 | 5  | 1985 | 1995 | 11 | 0.0067 | 0.5  | 0.32 | 100 | / | / | / |
| 5K23 | 4  | 1989 | 1995 | 7  | 0.0075 | 1.39 | 0.75 | 99  | / | / | / |
| 5L1  | 18 | 1985 | 2007 | 23 | 0.0048 | 0.21 | 0.1  | 100 | / | / | / |
| 5M1  | 1  | 1991 | 1991 | 1  | /      | 0    | 0    | 97  | / | / | / |
| 5M2  | 1  | 1993 | 1993 | 1  | /      | 0    | 0    | 97  | / | / | / |
| 5M3  | 1  | 1995 | 1995 | 1  | /      | 0    | 0    | 100 | / | / | / |
| 5M4  | 1  | 1995 | 1995 | 1  | /      | 0    | 0    | 100 | / | / | / |
| 5M5  | 1  | 2003 | 2003 | 1  | /      | 0    | 0    | 100 | / | / | / |
| 5M6  | 8  | 1987 | 1998 | 12 | 0.0069 | 0    | 0    | 93  | / | / | / |
| 5N1  | 6  | 1986 | 1990 | 5  | 0.0055 | 0    | 0    | 100 | / | / | / |
| 5N2  | 5  | 1998 | 2001 | 4  | 0.0057 | 0.67 | 0.48 | 80  | / | / | / |
| 5N3  | 5  | 1994 | 2004 | 11 | 0.0067 | 0    | 0    | 24  | / | / | / |
| 5N4  | 1  | 2004 | 2004 | 1  | /      | 0    | 0    | 80  | / | / | / |
| 5N5  | 1  | 1998 | 1998 | 1  | /      | 0    | 0    | 35  | / | / | / |
| 5N6  | 1  | 2004 | 2004 | 1  | /      | 0    | 0    | 19  | / | / | / |
| 5N8  | 8  | 1998 | 2001 | 4  | 0.0076 | 0    | 0    | 75  | / | / | / |
| 5N9  | 8  | 2000 | 2002 | 3  | 0.004  | 0.9  | 0.53 | 100 | / | / | / |
| 5N10 | 10 | 1997 | 2013 | 17 | 0.0076 | 1.09 | 0.66 | 59  | / | / | / |
| 5N11 | 9  | 2008 | 2012 | 5  | 0.0031 | 0    | 0    | 50  | / | / | / |
| 5N12 | 15 | 2009 | 2014 | 6  | 0.0066 | 0.88 | 0.55 | 57  | / | / | / |
| 5N13 | 8  | 2011 | 2013 | 3  | 0.0041 | 0.38 | 0.22 | 57  | / | / | / |
| 5N14 | 1  | 2014 | 2014 | 1  | /      | 0    | 0    | 77  | / | / | / |
| 5N15 | 1  | 2014 | 2014 | 1  | /      | 0    | 0    | 77  | / | / | / |
| 5N16 | 1  | 1995 | 1995 | 1  | /      | 0    | 0    | 80  | / | / | / |
| 5P1  | 19 | 1994 | 2009 | 16 | 0.0059 | 0.86 | 0.54 | 100 | / | / | / |
| 5P2  | 6  | 2008 | 2014 | 7  | 0.0076 | 0.64 | 0.44 | 92  | / | / | / |
| 5P3  | 11 | 2008 | 2015 | 8  | 0.007  | 0    | 0    | 75  | / | / | / |
| 5P4  | 1  | 2012 | 2012 | 1  | /      | 0    | 0    | 78  | / | / | / |
| 5P5  | 1  | 2013 | 2013 | 1  | /      | 0    | 0    | 74  | / | / | / |
| 5P6  | 8  | 2012 | 2013 | 2  | 0.0038 | 0    | 0    | 75  | / | / | / |
| 5P10 | 1  | 2013 | 2013 | 1  | /      | 0    | 0    | 40  | / | / | / |

Note: Year<sub>first</sub>: the year when the first strain of the subgenotype was recorded; Year<sub>latest</sub>: the year when the latest strain of the subgenotype was recorded; PS<sub>observed</sub>: Year<sub>latest</sub> - Year<sub>first</sub>; MPD: Mean pairwise distance; SWI: Shannon-Wiener index; SI: Simpson index; UFBoot: Ultrafast Bootstrap value; tMRCA: the most recent common ancestor.



## D. Characterization of the unified global genotyping framework of DENV-1

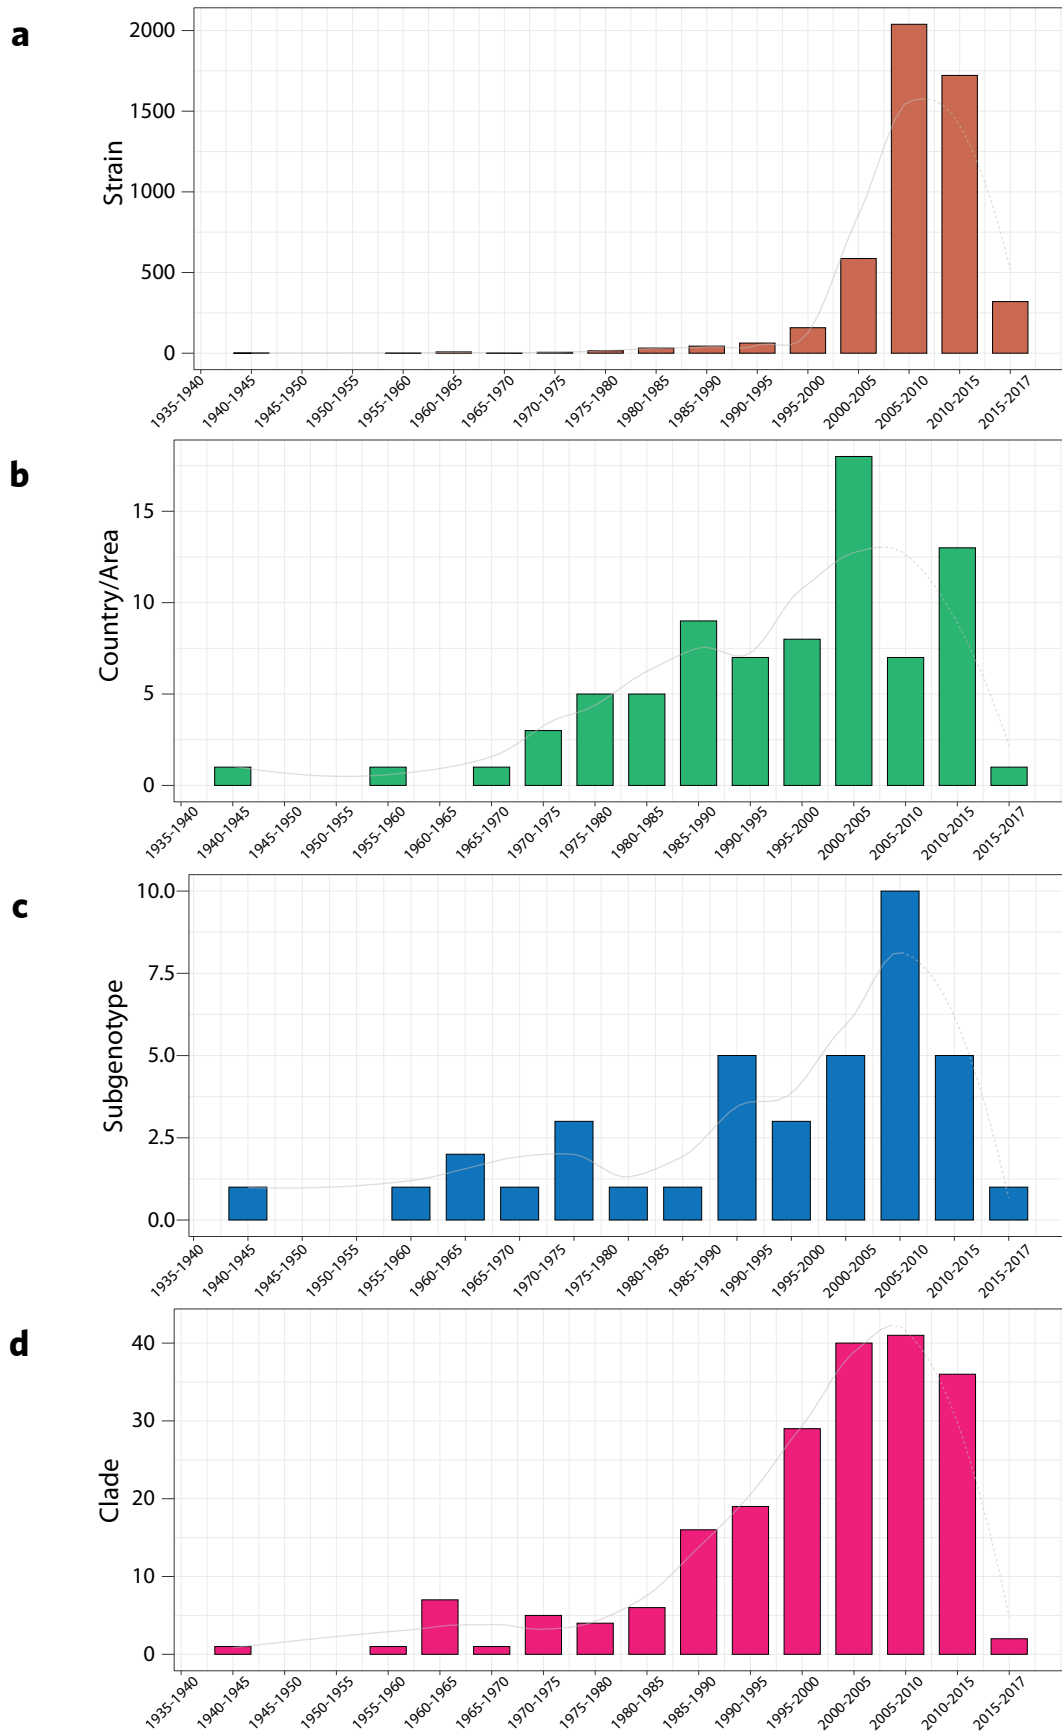

**Additional file 1 Fig. S D1 Trends of global increasing expansion of DENV-1.** **a**, The new isolated strains of DENV-1, **b**, new reporting DENV-1 isolation countries/areas, **c**, new emerging subgenotypes, **d**, and new emerging clades of DENV-1 were counted each five years.

**Additional file 1 Table S D1 The associations between the substitution rates and tMRCAs of the included clades evaluated by the linear regression model after adjustment of the strains number, MPDs and Simpson Index.**

| Variable          | Change with substitution rate | 95% CI                           | <i>P</i> |
|-------------------|-------------------------------|----------------------------------|----------|
| tMRCA             | $2.9 \times 10^{-5}$          | (1.3 - $4.4 \times 10^{-5}$ )    | <0.001   |
| Number of strains | $5.4 \times 10^{-7}$          | (-4.4 - $15.2 \times 10^{-7}$ )  | 0.289    |
| MPDs              | $1.5 \times 10^{-2}$          | (-6.1 - $9.1 \times 10^{-2}$ )   | 0.703    |
| SI                | $-1.6 \times 10^{-5}$         | (-37.8 - $34.6 \times 10^{-5}$ ) | 0.932    |

tMRCA: the most recent common ancestor; MPDs: Mean pairwise distance; SI: Simpson index; CI: confidence interval

## E: Global geographic distribution and epidemic regional classification.

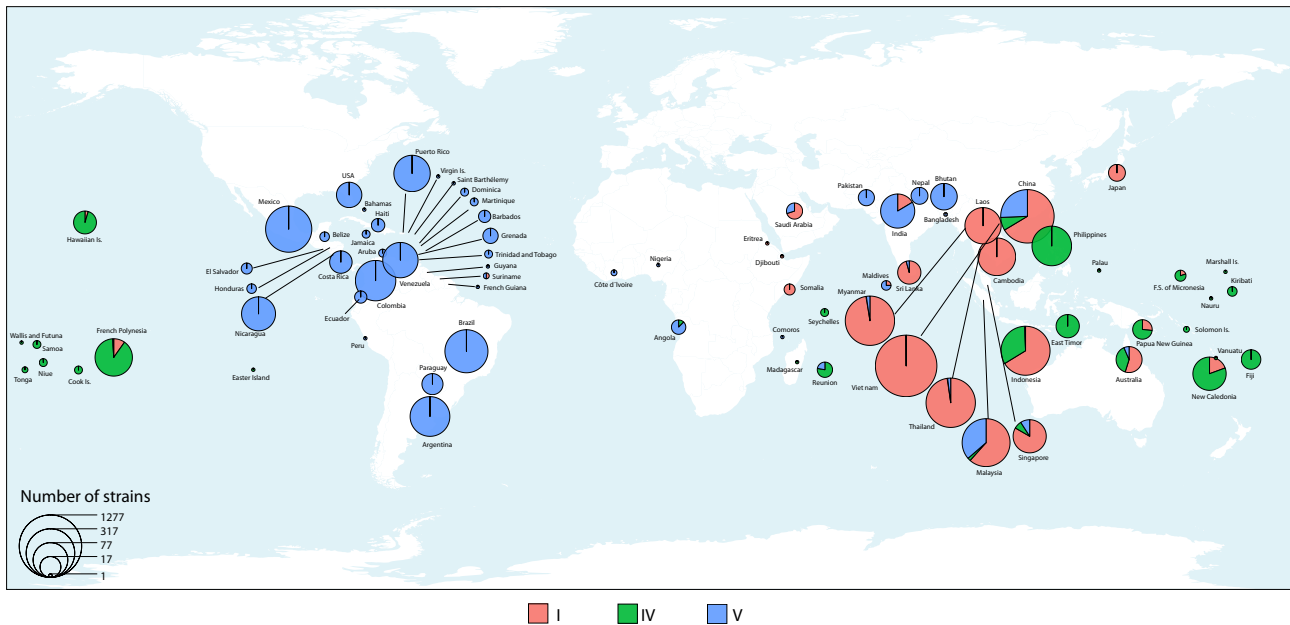

**Additional file 1 Fig. S E1 Global geographical distributions of genotype I, IV, and V of DENV-1 by countries/areas.** A continental constraint at genotype level was observed, where genotype I was highly restrictively in Asia (98.2%, 2885/2939) especially in East Asia (80.1%, 2374/2939) and Southeast Asia (16.5%, 486/2939), and circulated in Red Sea region in recent years (0.5%, 14/2939). Genotype IV was mainly dispersed in island regions near the equator including Oceania (38.3%, 214/559), Malay Archipelago (51.7%, 289/559), and several Southwest Indian Ocean archipelago (2.0%, 11/559). The majority of genotype V was reported from America (72.8%, 1079/1482) and South Asian Subcontinent (8.1%, 120/1482). Meanwhile, genotypes II and III were only recorded in Asia.

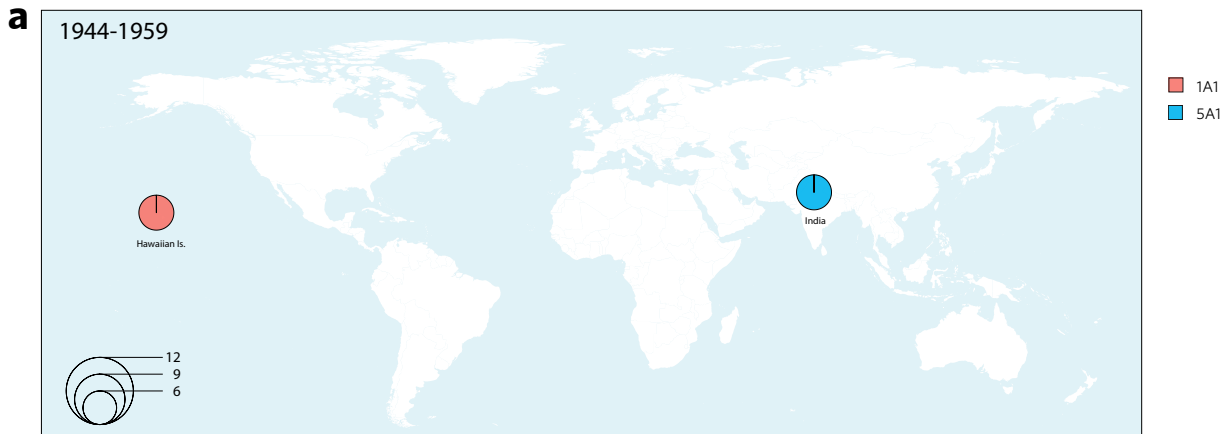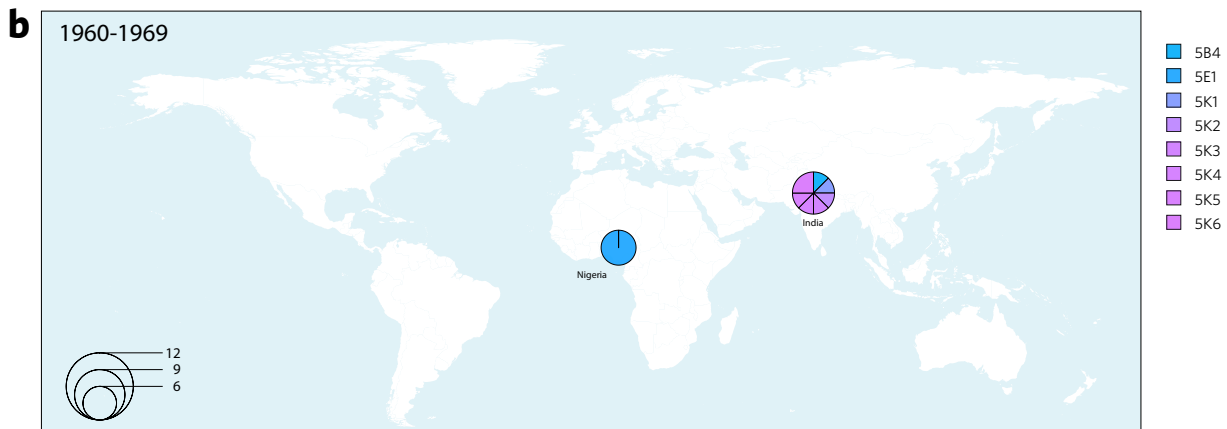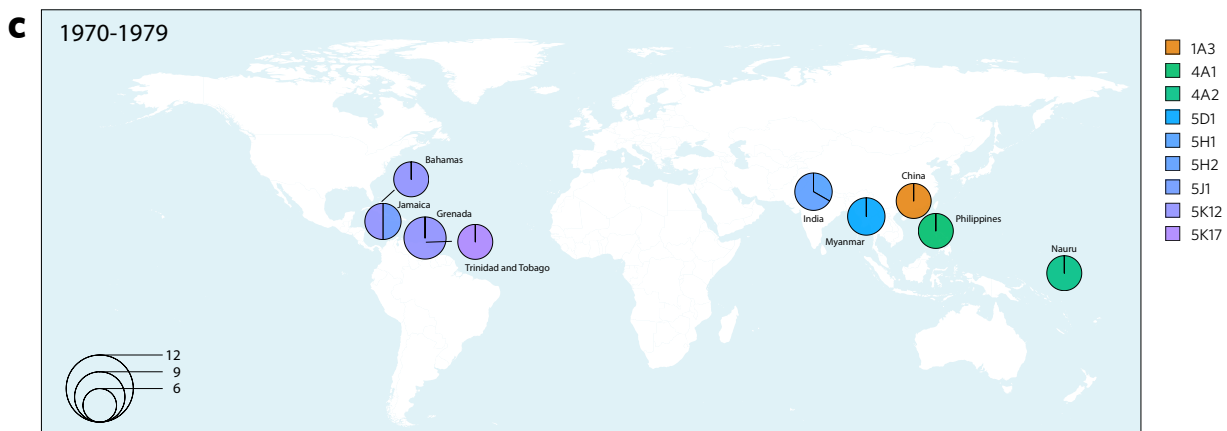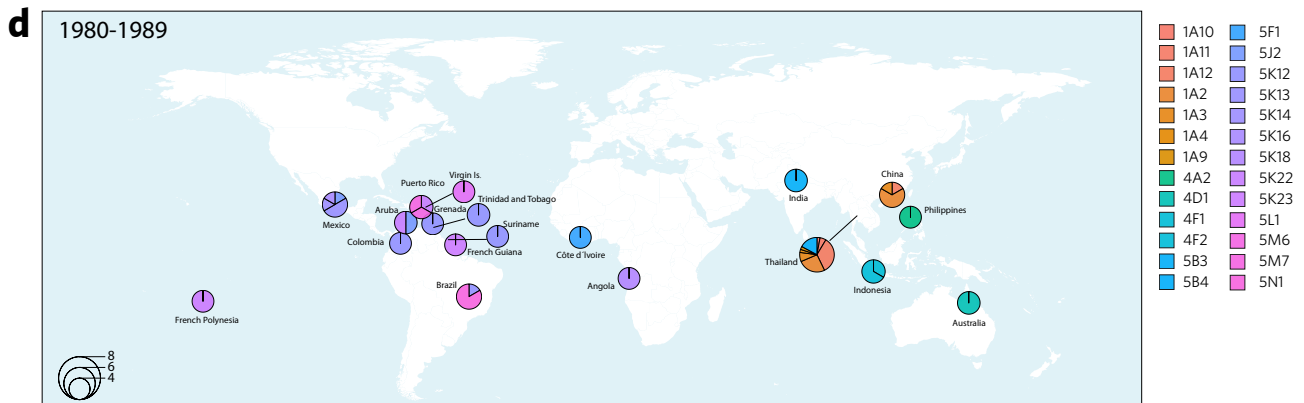

e

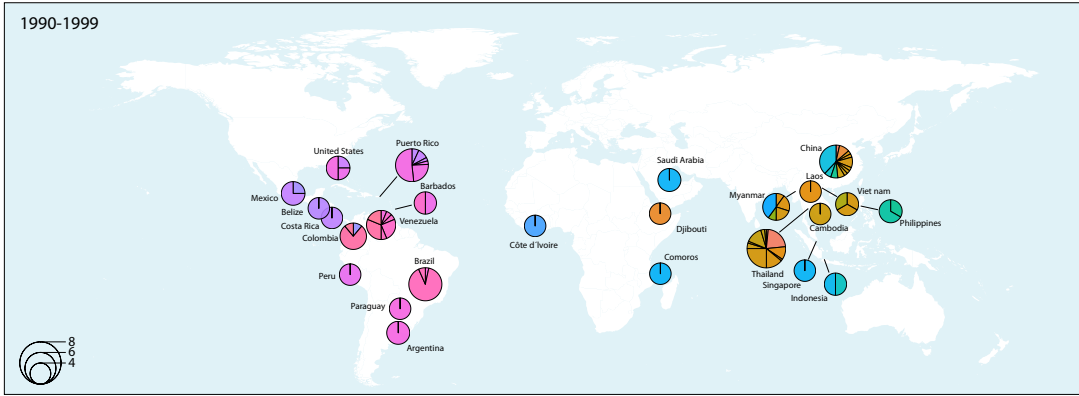

f

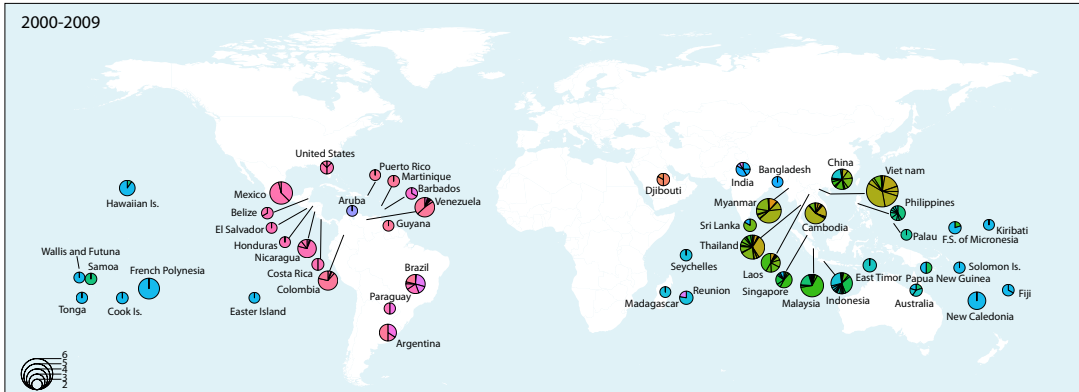

g

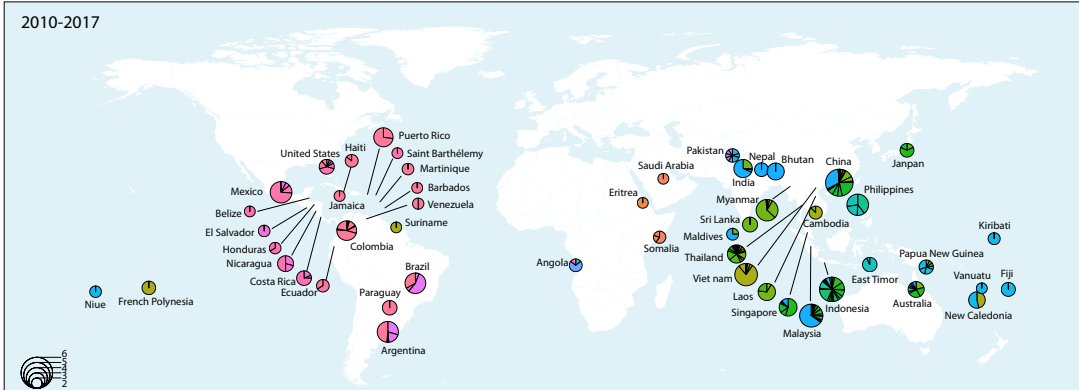

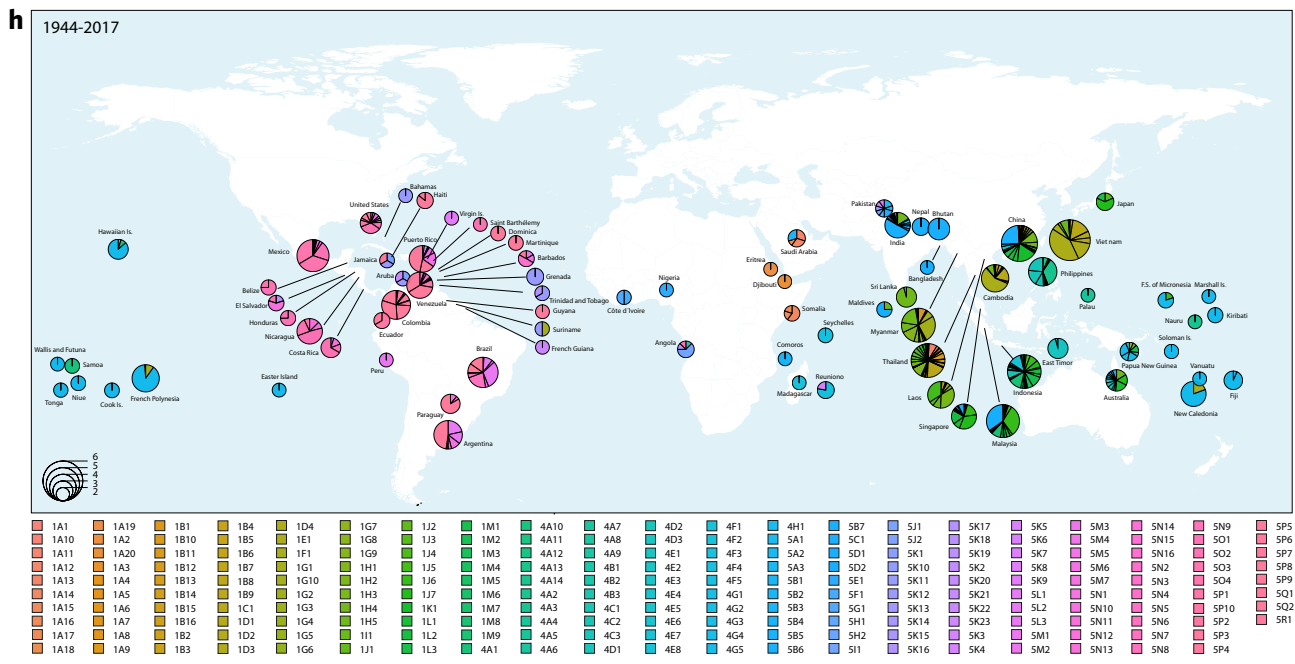

**Additional file 1 Fig. S E2 Global spreading of DENV-1 genotype I, IV, and V clades by countries/areas from 1944 to 2017 counted by every ten years.** Each panel displayed circulating clades and the corresponding countries in that period. Pies are sized to indicate the number of isolates and the colors in the pies indicate the defined clade. **a**, 1944-1959, **b**, 1960-1969, **c**, 1970-1979, **d**, 1980-1989, **e**, 1990-1999, **f**, 2000-2009, **g**, 2010-2017 **h**, 1944-2017. Before 1970s, DENV-1 isolates were reported in Hawaiian Is. (USA, 1944), Nigeria (Africa, 1968), and India (South Asian sub-continent, 1956), which indicated that DENV-1 had been epidemic in Oceania, Africa, and Asia continents, and India recorded with 8 defined clades which represented a higher population diversity of DENV-1. After 1970s, DENV-1 showed a rapid expansion, strains were firstly isolated in Jamaica, Grenada, and Bahamas in American continent in 1977, and then 50 countries/areas were instantly affected with 105 and 94 circulating clades of DENV-1 during 2000 to 2009, and 2010-2017, respectively.

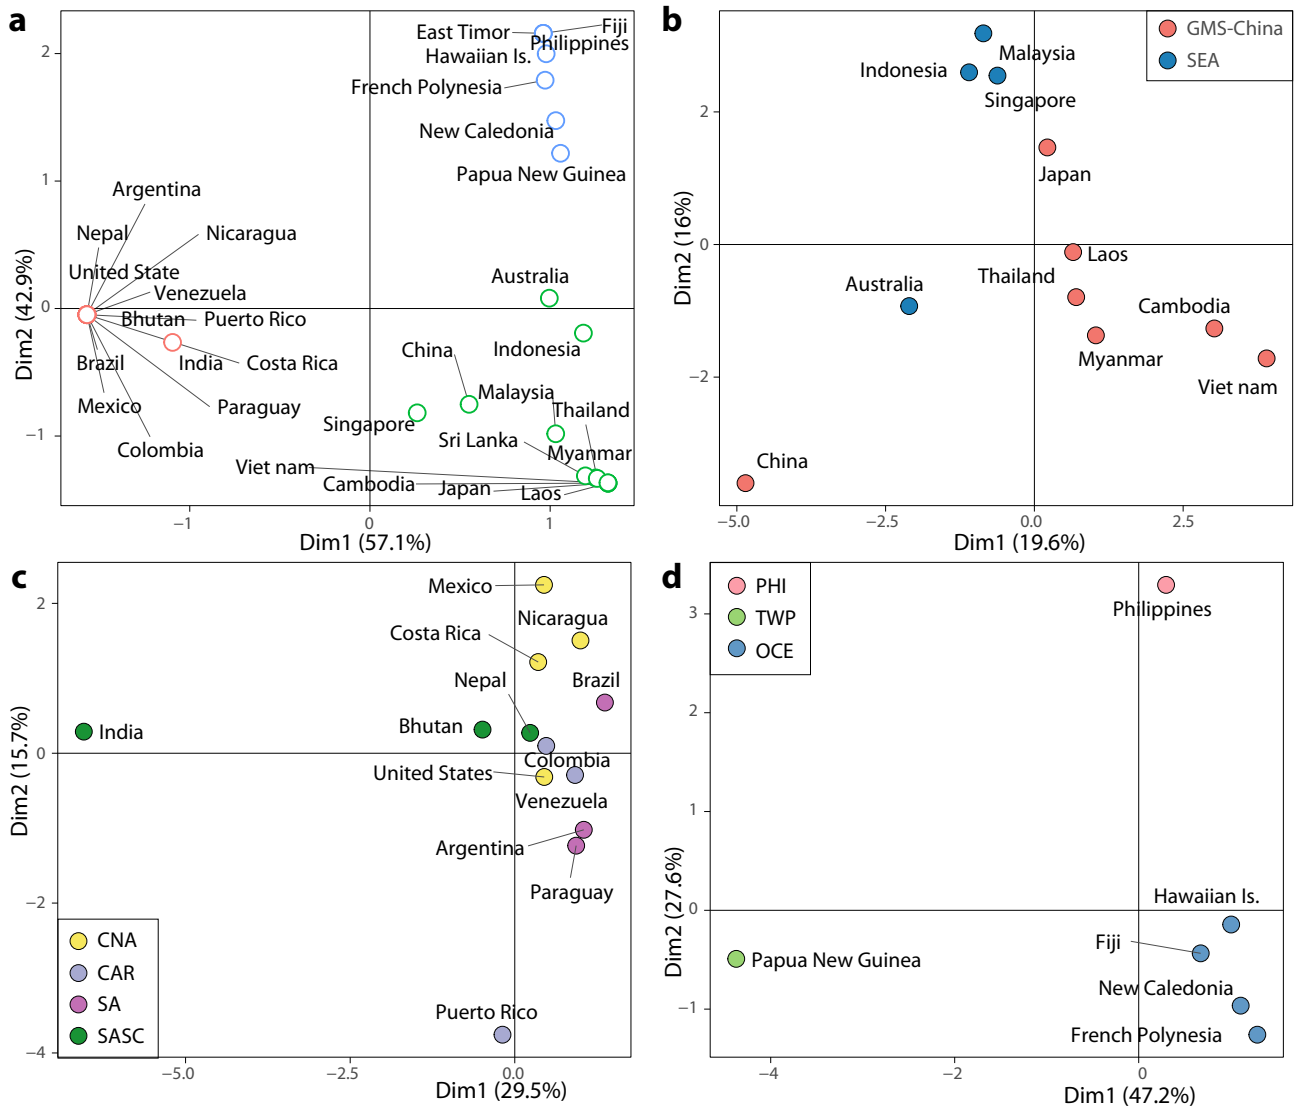

**Additional file 1 Fig. S E3 Geographical hierarchical clustering of DENV-1 at the genotype and subgenotype levels.** Using partitioning around medoid (PAM), which was implemented in “factoextra” package in R software, 32 countries/areas with more than 10 DENV-1 strains were selected for geographical clustering based on composition and frequencies of genotype or subgenotype. The optimal numbers of clusters were assessed and chosen using silhouette method. **a**, the preliminary three geographical clustering corresponding three genotypes were evidently continentally constraint consistent with the previous studies. According this continental separation, countries/areas within in Asia (**b**), America (**c**) and pacific islands (**d**) were further clustered at subgenotype level for high resolution of DENV-1 circulation pattern.

**Additional file 1 Table S E1 Compositions of countries/areas in the defined 12 epidemic regions of DENV-1**

| <b>Epidemic region</b>       | <b>Abbreviation of region</b> | <b>Countries/areas included</b>                                                                                                                                                                              | <b>Number of included countries/ areas</b> |
|------------------------------|-------------------------------|--------------------------------------------------------------------------------------------------------------------------------------------------------------------------------------------------------------|--------------------------------------------|
| West African Region          | WAFR                          | Angola, Côte d'Ivoire, Nigeria                                                                                                                                                                               | 3                                          |
| Red Sea Region               | RSR                           | Djibouti, Eritrea, Saudi Arabia, Somalia                                                                                                                                                                     | 4                                          |
| Southwest Indian Ocean       | SWIO                          | Comoros, Madagascar, Reunion, Seychelles                                                                                                                                                                     | 4                                          |
| South Asia Subcontinent      | SASC                          | Bangladesh, Bhutan, India, Maldives, Nepal, Pakistan, Sri Lanka                                                                                                                                              | 7                                          |
| Great Mekong Subregion-China | GMS-China                     | Cambodia, China, Japan, Laos, Myanmar, Thailand, Vietnam                                                                                                                                                     | 7                                          |
| Southeast Asia               | SEA                           | Australia, East Timor, Indonesia, Malaysia, Singapore                                                                                                                                                        | 5                                          |
| Philippines                  | PHI                           | Palau, Philippines                                                                                                                                                                                           | 2                                          |
| Tropical Western Pacific     | TWP                           | Marshall Is., F.S. of Micronesia, Nauru, Papua New Guinea, Solomon Is.                                                                                                                                       | 5                                          |
| Oceania                      | OCE                           | Cook Is., Easter Island, Fiji, French Polynesia, Kiribati, New Caledonia, Niue, Samoa, Tonga, Hawaiian Is., Vanuatu, Wallis and Futuna                                                                       | 12                                         |
| Central North America        | CNA                           | Belize, Costa Rica, Honduras, El Salvador, Mexico, Nicaragua, United States                                                                                                                                  | 7                                          |
| Caribbean                    | CAR                           | Aruba, Bahamas, Barbados, Colombia, Dominica, Ecuador, French Guiana, Grenada, Guyana, Haiti, Jamaica, Martinique, Peru, Puerto Rico, Saint Barthélemy, Suriname, Trinidad and Tobago, Venezuela, Virgin Is. | 19                                         |
| South America                | SA                            | Argentina, Brazil, Paraguay                                                                                                                                                                                  | 3                                          |
| Worldwide                    |                               |                                                                                                                                                                                                              | 78                                         |

Note: Based on the first geographical clustering in Fig. S-E3, the detailed information involving epidemiology, geographical proximity, and the main epidemic subgenotype composition were thus complemented in further geographical classification. For example, due to lack of understanding of dengue epidemiologically and the probability of underreporting in African continent, where no African countries recorded more than 10 isolates of DENV-1 except only one strain reported respectively in Djibouti, Eritrea, Nigeria, Madagascar, and Comoros, but all the African countries involved and those with similar rare records of DENV-1 on other continents (46 in total) are still of high concern and then were included for the analyses of global geographical distribution.



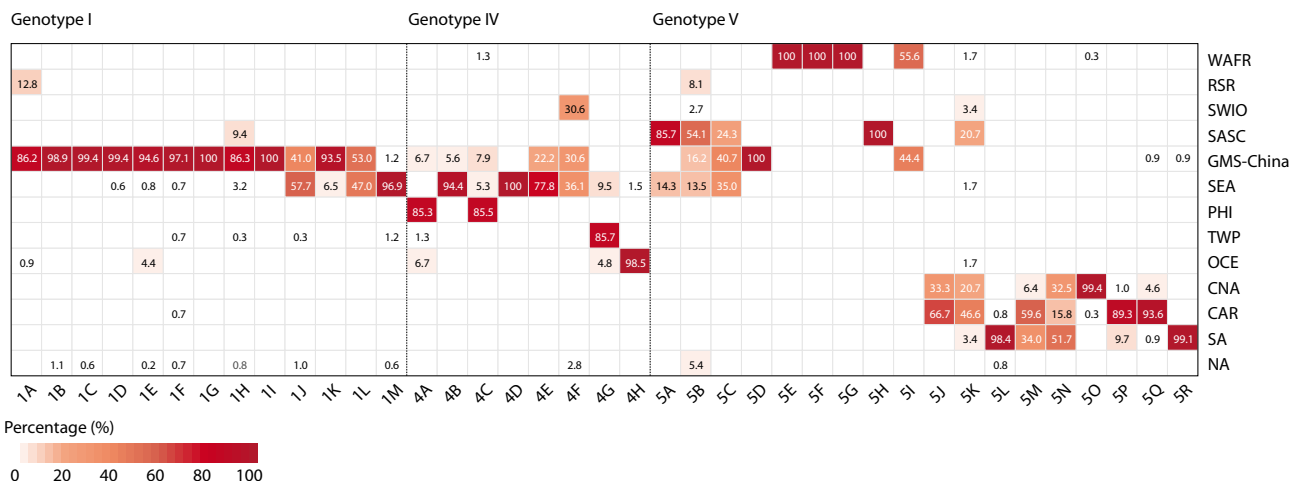

**Additional file 1 Fig. S E4 Heatmap of defined clade distribution displayed by 12 epidemic regions by percentages.** For certain clade, the distribution in all reported countries/areas equals 100%; the percentages in a specific region showed in the corresponding cell. Subgenotype 5K was found spreading across SEA, SASC, SA, CAR, CNA, OCE, SWIO, and WAFR, while 5B across SEA, GMS-China, SASC, SWIO, and RSR; 4F across SEA, GMS-China, and SWIO; 5C across GMS-China, SEA, and SASC; 5M and 5N across SA, CAR, and CNA. WAFR, West African Region; RSR, Red Sea Region; SWIO, Southwest Indian Ocean; SASC, South Asia Subcontinent; GMS-China, Great Mekong Subregion-China; SEA, Southeast Asia; PHI, Philippines; TWP, Tropical Western Pacific; OCE, Oceania; CNA, Central North America; CAR, Caribbean; SA, South America.

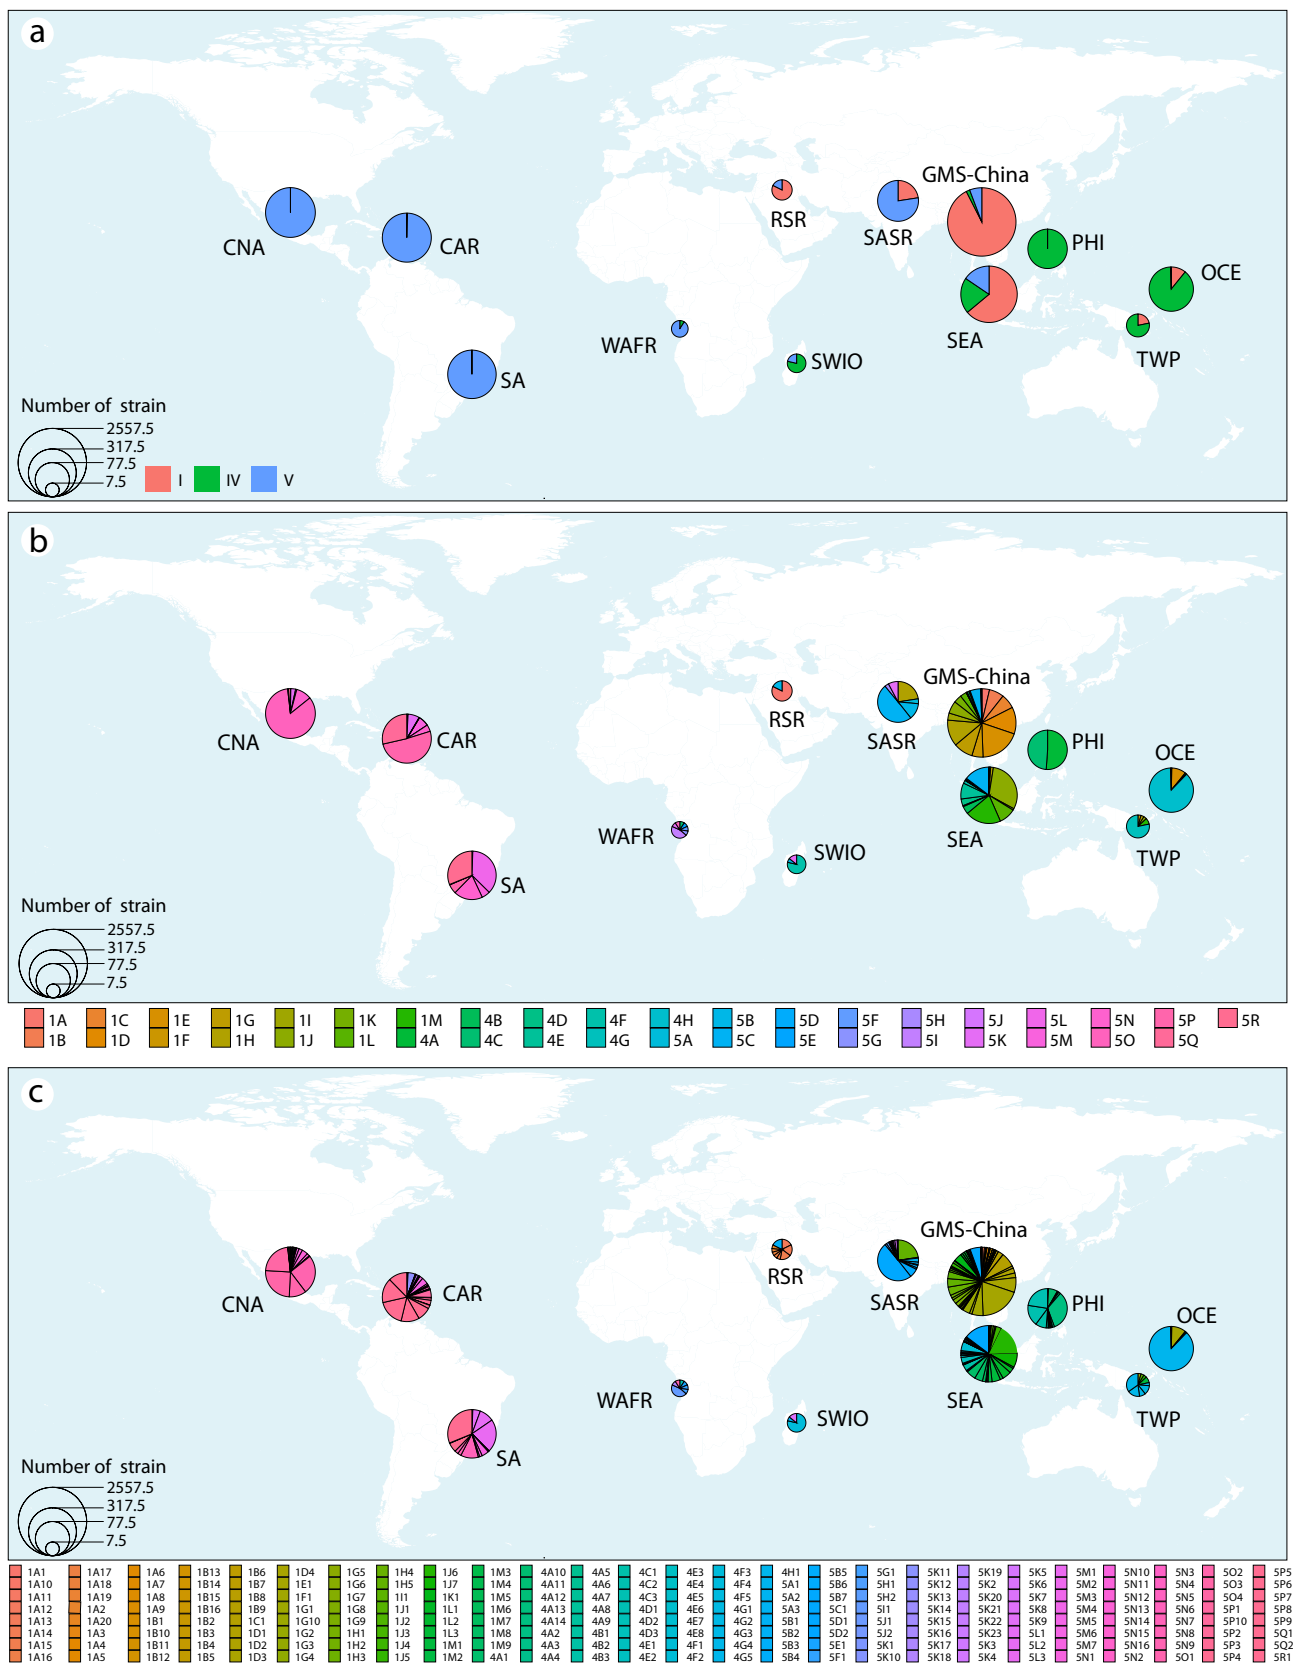

**Additional file 1 Fig. S E5 Global geographical distributions of genotypes I, IV, and V of DENV-1 represent by 12 classified epidemic regions.** Pies are sized to indicate the number of isolates and colors in the pies indicate genotype (a), subgenotype (b), and clade (c) compositions, respectively. Apparently, Genotypes I, IV and V presented in SEA and GMS-China, while I and IV co-circulated in SASR and RSR, I and V in OCE and TWP. WAFR, West African Region; RSR, Red Sea Region; SWIO, Southwest Indian Ocean; SASR, South Asia Subcontinent; GMS-China, Great Mekong Subregion-China; SEA, Southeast Asia; PHI, Philippines; TWP, Tropical Western Pacific; OCE, Oceania; CNA, Central North America; CAR, Caribbean; SA, South America.

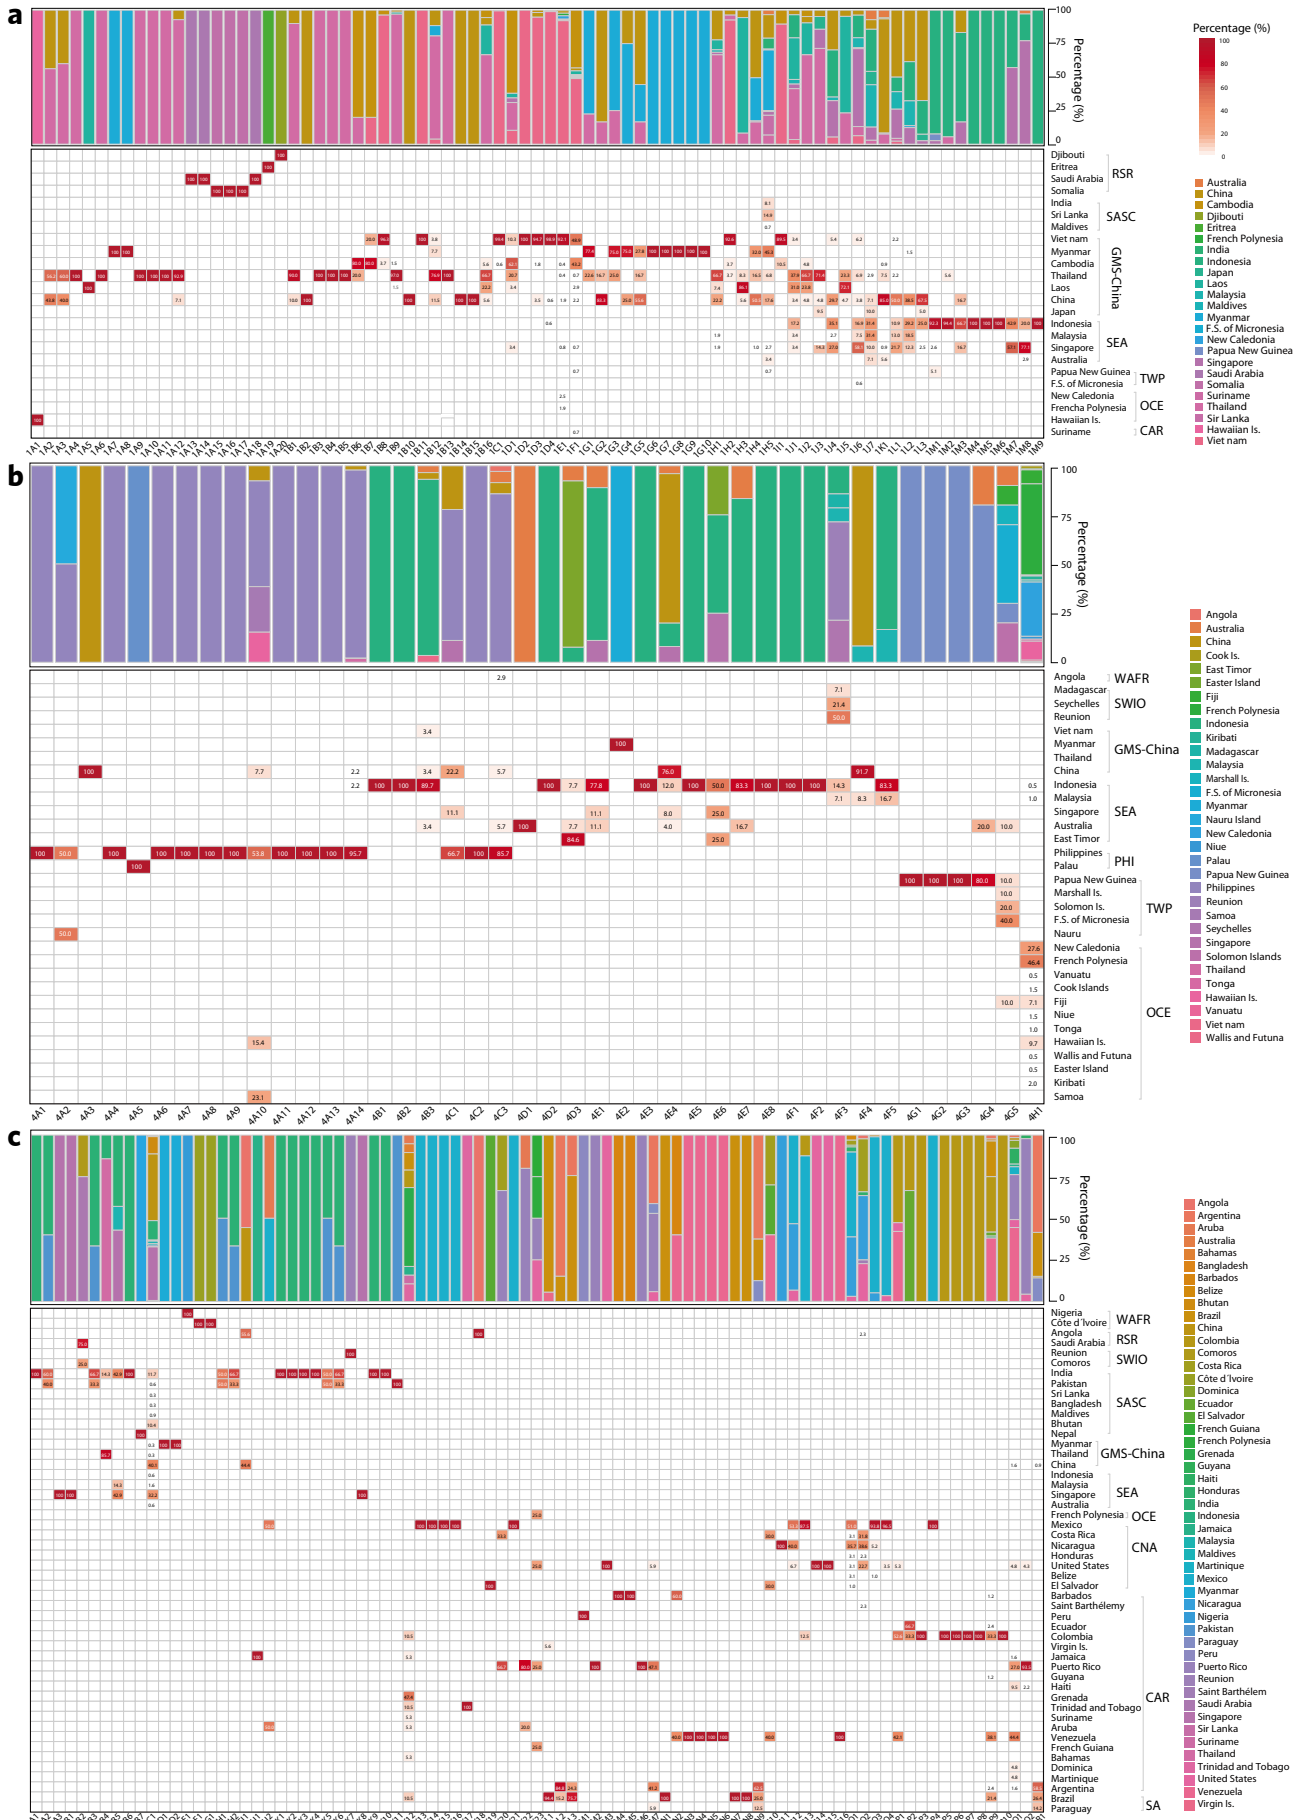

**Additional file 1 Fig. S E6 Heatmap of the defined clade distribution displayed by countries/areas by percentage.** For a certain clade, the distribution in all reported countries/areas equals 100%; the percentage in each country/area displayed in the corresponding cell. The stacked barplot of proportion in each clade is colored by countries/areas in the panel above. **a**, Clades in genotype I of DENV-1, **b**, Clades in genotype IV of DENV-1, **c**, Clades in genotype I of DENV-1.

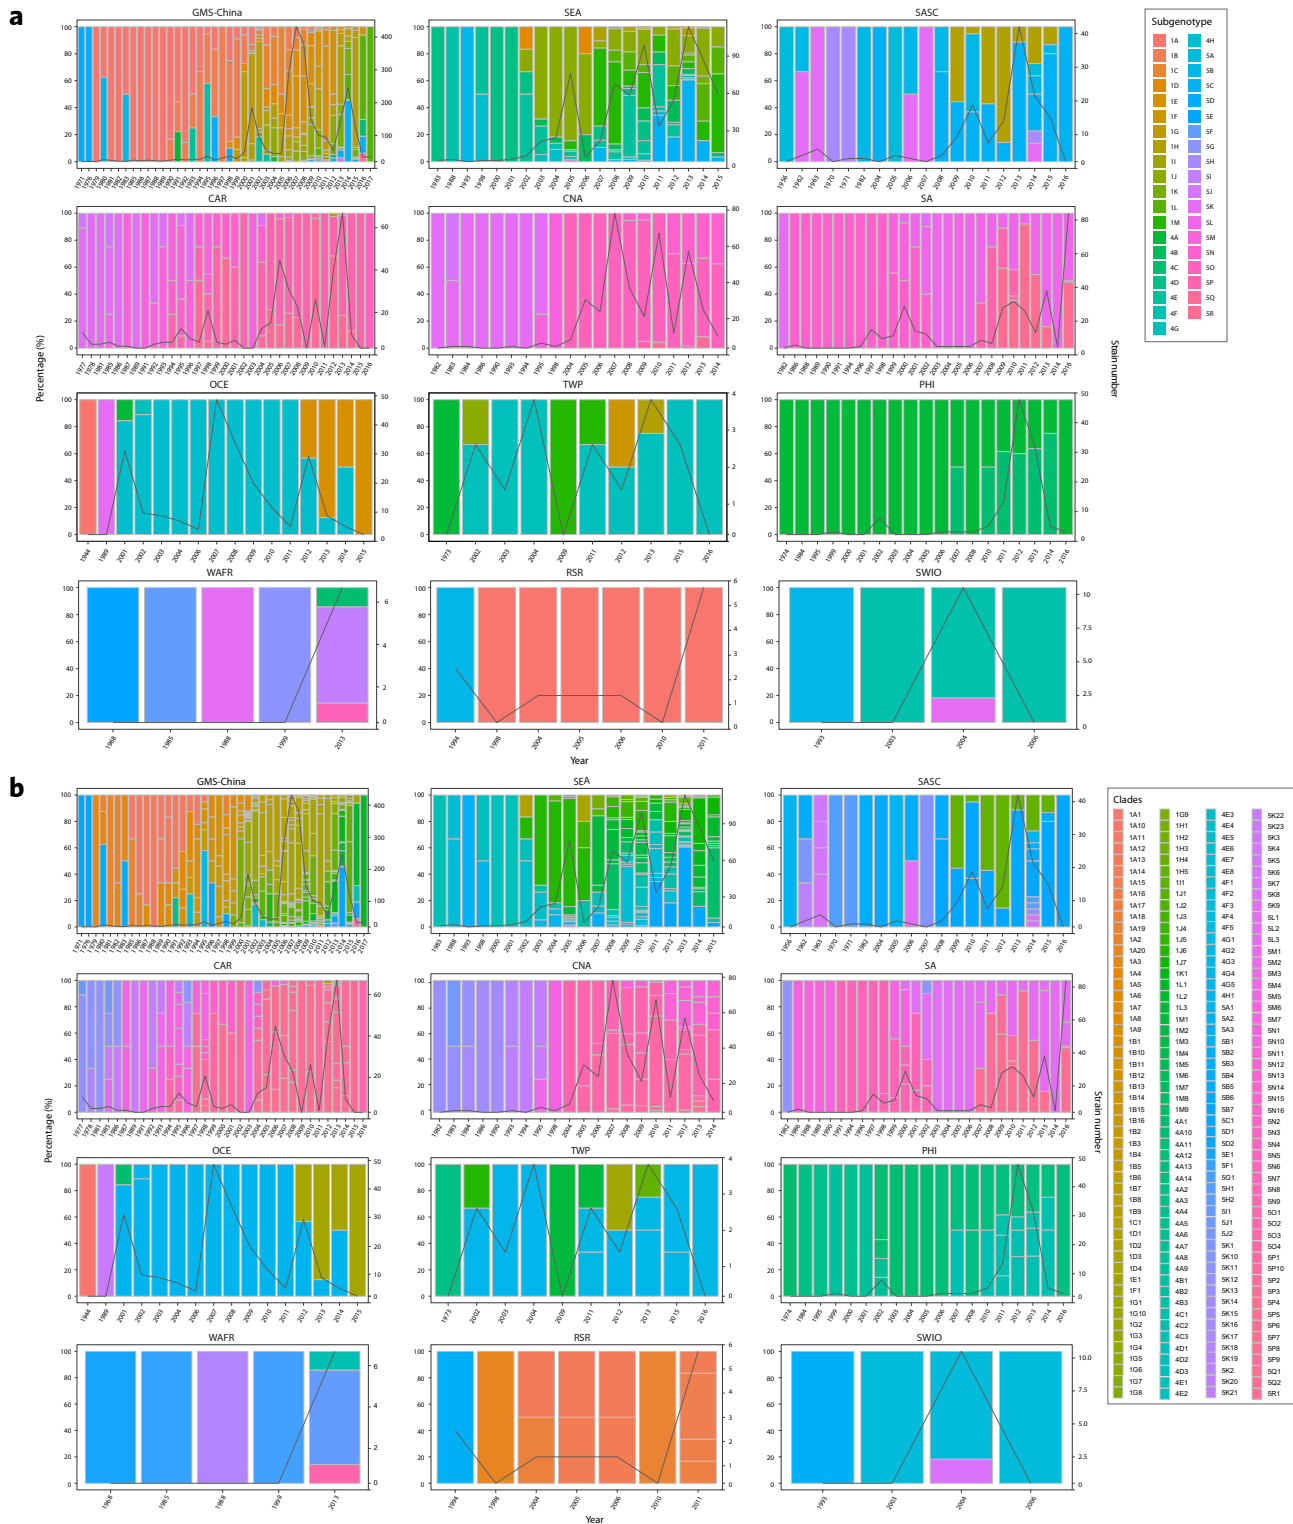

**Additional file 1 Fig. S E7 Relatively specific circulation patterns of subgenotypes and clades in each epidemic region.** Stacked barplots of proportion are colored by subgenotypes (a) and clades (b) along time in each epidemic region. WAFR, West African Region; RSR, Red Sea Region; SWIO, Southwest Indian Ocean; SASC, South Asia Subcontinent; GMS-China, Great Mekong Subregion-China; SEA, Southeast Asia; PHI, Philippines; TWP, Tropical Western Pacific; OCE, Oceania; CNA, Central North America; CAR, Caribbean; SA, South America.

## F: Global transmission pattern of DENV-1 at subgenotype level

Additional file 1 Table S F1 The transmission pairs with involved subgenotypes  $\geq 3$

| Transmission pairs          | Epidemic regions | Subgenotypes involved | Number |
|-----------------------------|------------------|-----------------------|--------|
| China - Thailand            | GMS_China        | 1A, 1B, 1G, 1J, 1K    | 5      |
| China - Viet nam            | GMS_China        | 1B, 1D, 1E, 1H, 1J    | 5      |
| Argentina - Brazil          | SA               | 5L, 5N, 5P, 5R        | 4      |
| China - Indonesia           | GMS_China & SEA  | 1L, 1M, 4B, 4E        | 4      |
| Indonesia - Singapore       | SEA              | 1L, 1M, 4E, 5C        | 4      |
| Argentina - Paraguay        | SA               | 5M, 5N, 5R            | 3      |
| Australia - Indonesia       | SEA              | 1J, 4B, 4E            | 3      |
| Cambodia - Laos             | GMS_China        | 1D, 1F, 1J            | 3      |
| China - Malaysia            | GMS_China & SEA  | 1J, 1L, 4F            | 3      |
| China - Myanmar             | GMS_China        | 1G, 1H, 5C            | 3      |
| China - Singapore           | GMS_China & SEA  | 1K, 4C, 5C            | 3      |
| Mexico - United States      | CNA              | 5N, 5O, 5P            | 3      |
| Myanmar - Thailand          | GMS_China        | 1A, 1B, 1G            | 3      |
| Puerto Rico - United States | CNA & CAR        | 5K, 5M, 5Q            | 3      |
| Singapore - Viet nam        | SEA & GMS_China  | 1E, 1J, 1L            | 3      |
| Thailand - Viet nam         | GMS_China        | 1D, 1E, 1J            | 3      |

**Additional file 1 Table S F2 The transmission pairs inferred by BSSVS from 29 DENV-1 subgenotypes**

| Subgenotype | Transmission pair           | Bayes Factor | Transmission rate | Epidemic region |
|-------------|-----------------------------|--------------|-------------------|-----------------|
| 1A          | China-Thailand              | 28270.73674  | 1.8204            | GMS-China       |
| 1B          | China-Thailand              | 19237.83713  | 1.6583            | GMS-China       |
| 1B          | Cambodia-Thailand           | 4807.85613   | 1.1049            | GMS-China       |
| 1B          | Cambodia-Viet nam           | 2135.637426  | 1.0577            | GMS-China       |
| 1D          | Cambodia-Viet nam           | 19237.83713  | 1.3507            | GMS-China       |
| 1D          | Cambodia-Laos               | 425.4174552  | 1.0307            | GMS-China       |
| 1E          | Cambodia-China              | 23756.42518  | 1.4306            | GMS-China       |
| 1E          | China-Viet nam              | 23756.42518  | 1.2261            | GMS-China       |
| 1E          | Singapore-Viet nam          | 23756.42518  | 1.0332            | SEA, GMS-China  |
| 1F          | Cambodia-China              | 28270.73674  | 1.428             | GMS-China       |
| 1G          | Myanmar-Thailand            | 1025.445395  | 1.0059            | GMS-China       |
| 1H          | China-Myanmar               | 50810.93968  | 3.0279            | GMS-China       |
| 1J          | China-Thailand              | 15.46323389  | 1.1519            | GMS-China       |
| 1J          | China-Malaysia              | 15.47291029  | 1.1504            | GMS-China, SEA  |
| 1J          | Australia-Indonesia         | 41798.9843   | 1.085             | SEA             |
| 1L          | Malaysia-Singapore          | 23756.42518  | 2.3752            | SEA             |
| 1L          | China-Malaysia              | 1128.744434  | 1.3901            | GMS-China, SEA  |
| 1L          | China-Indonesia             | 414.1860951  | 1.0852            | GMS-China, SEA  |
| 1M          | Indonesia-Singapore         | 16.27392156  | 1.9377            | SEA             |
| 4A          | China-Philippines           | 19237.83713  | 1.4004            | GMS-China, PHI  |
| 4A          | Samoa-Hawaiian Is.          | 64.43676936  | 1.1365            | OCE             |
| 4C          | China-Philippines           | 10176.89698  | 1.4144            | GMS-China, PHI  |
| 4C          | China-Singapore             | 15.77625651  | 1.0513            | GMS-China, SEA  |
| 4E          | Australia-Indonesia         | 14712.71912  | 1.3137            | SEA             |
| 4E          | Indonesia-Singapore         | 7355.542187  | 1.2961            | SEA             |
| 4F          | Indonesia-Malaysia          | 130.551943   | 1.3338            | SEA             |
| 4H          | Fiji-New Caledonia          | 384.0194727  | 1.4334            | OCE             |
| 5C          | China-Singapore             | 46305.43292  | 2.8196            | GMS-China, SEA  |
| 5C          | China-India                 | 2567.664839  | 1.6255            | GMS-China, SASC |
| 5K          | Grenada-Trinidad and Tobago | 1015.57413   | 1.2878            | CAR             |
| 5K          | India-Pakistan              | 189.4203805  | 1.062             | SASC            |
| 5K          | Grenada-Puerto Rico         | 22.51325636  | 1.0223            | CAR             |
| 5L          | Argentina-Brazil            | 5621.675595  | 1.6077            | SA              |
| 5M          | Argentina-Paraguay          | 14712.71912  | 1.423             | SA              |
| 5M          | Puerto Rico-United States   | 3676.95372   | 1.2028            | CAR, CNA        |
| 5N          | El Salvador-Nicaragua       | 824.6448084  | 1.4453            | CNA             |
| 5N          | Argentina-Paraguay          | 843.4809059  | 1.0197            | SA              |
| 5O          | Costa Rica-Nicaragua        | 28270.73674  | 1.9258            | CNA             |
| 5O          | Costa Rica-United States    | 212.6899363  | 1.2179            | CNA             |
| 5O          | Costa Rica-Honduras         | 178.1016143  | 1.0957            | CNA             |
| 5P          | Colombia-Venezuela          | 28270.73674  | 1.4939            | CAR             |
| 5Q          | Puerto Rico-United States   | 28270.73674  | 1.8615            | CAR, CNA        |
| 5Q          | Haiti-Puerto Rico           | 4709.171796  | 1.2528            | CAR             |
| 5R          | Argentina-Brazil            | 5621.675595  | 1.4287            | SA              |

Notes: Only the pairs with transmission rate  $\geq 1$  from the 172 pairs totally inferred in the study are showed in this table. BSSVS: the Bayesian stochastic search variable selection; WAFR, West African Region; RSR, Red Sea Region; SWIO, Southwest Indian Ocean; SASC, South Asia Subcontinent; GMS-China, Great Mekong Subregion-China; SEA, Southeast Asia; PHI, Philippines; TWP, Tropical Western Pacific; OCE, Oceania; CNA, Central North America; CAR, Caribbean; SA, South America.

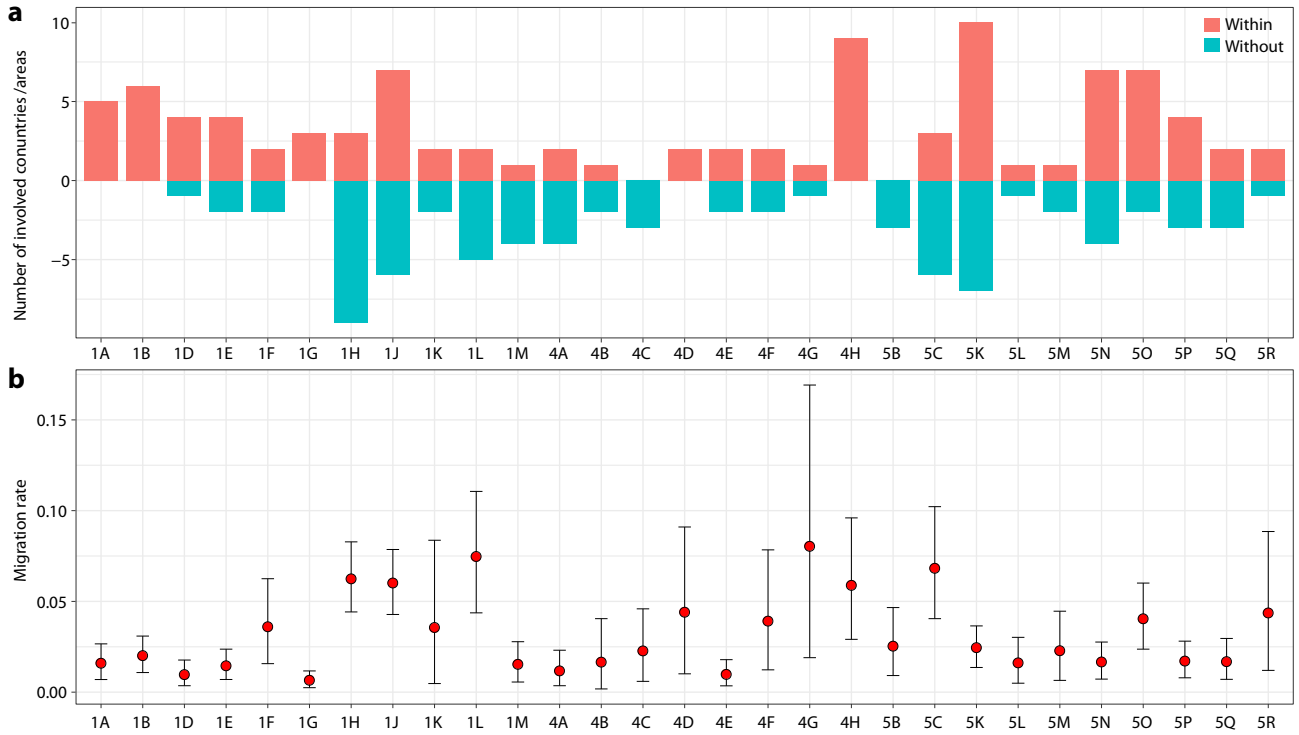

**Additional file 1 Fig. S F1 Estimates of 29 DENV-1 subgenotypes involving the transmission pairs inferred by BSSVS. a,** Numbers of countries/areas involving the transmission pairs of each subgenotype. **b,** Estimates of migration rate in each included subgenotype. The red points and error bars show the median and the 95% Bayesian credible intervals, respectively.

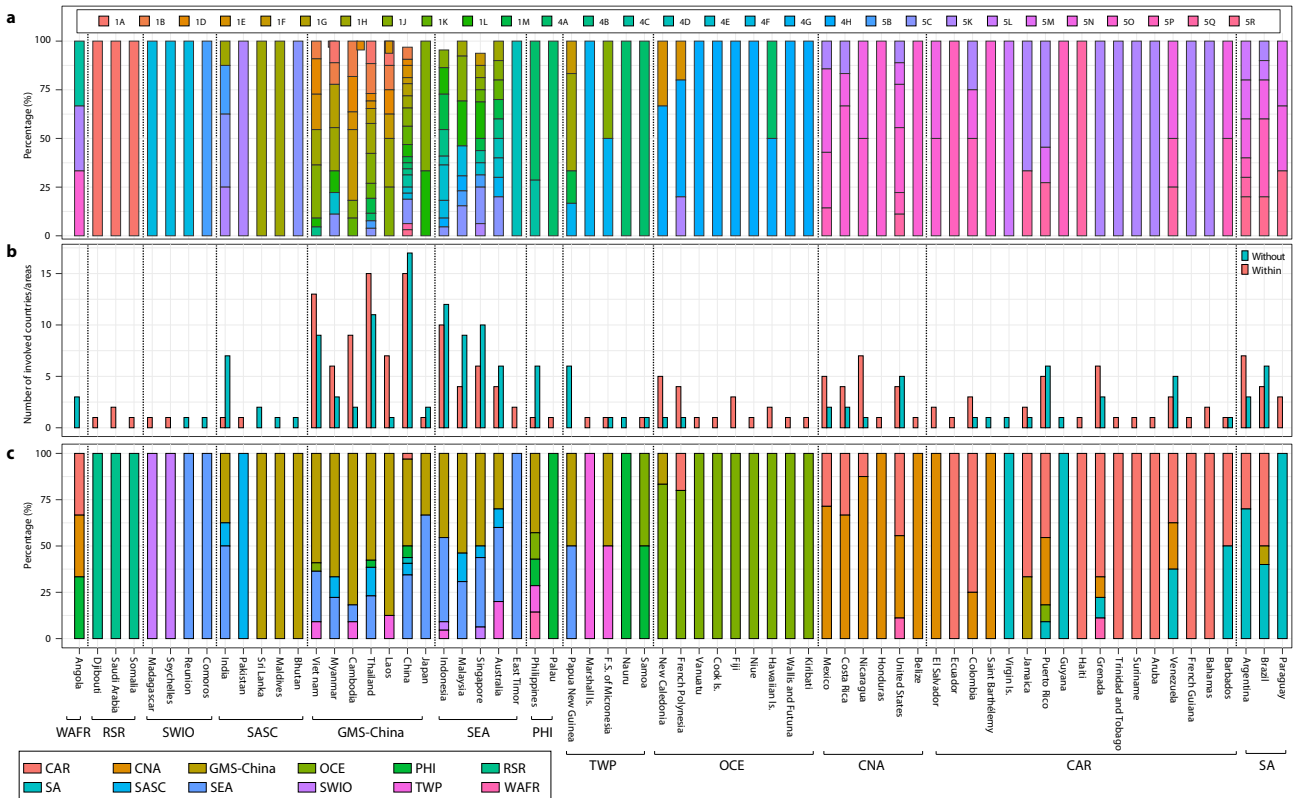

**Additional file 1 Fig. S F2 DENV-1 transmission pairs in each epidemic country/area within and without its belonging epidemic regions inferred by BSSVS at the subgenotype level. a,** Stacked barplots indicate the proportion of involved subgenotypes in each epidemic country/area. **b,** Numbers of involved transmission countries/areas. **c,** Stacked barplots show the proportion of epidemic regions involved transmission. WAFR, West African Region; RSR, Red Sea Region; SWIO, Southwest Indian Ocean; SASC, South Asia Subcontinent; GMS-China, Great Mekong Subregion-China; SEA, Southeast Asia; PHI, Philippines; TWP, Tropical Western Pacific; OCE, Oceania; CNA, Central North America; CAR, Caribbean; SA, South America.



## **G: Sources and trend of DENV-1 diffusion at clade level**

### **Spatiotemporal dynamics and viral diversity assessed by PACT at the clade level**

For demonstration of spatiotemporal dynamics and global epidemic patterns of DENV-1 at the clade level, PACT was used in the present study as a further extension of the BEAST analyses described above. Consequently, through inferring the trunks of epidemic countries/areas by time and coalescent estimation of migration rates of the involved 43 clades, including 26, 6 and 11 clades from genotypes I, IV and V of DENV-1, respectively, only those with a trunk probability >50% in certain clade in at least 12 consecutive months were estimated by PACT as the dominant epidemic locations (Fig.4, Fig. S G1). As shown in Fig. S-G1, it was obvious that the clades 1B8, 1C1 and 1D3 mainly persisted in Vietnam, 1G1 in Myanmar, 1H3 in Lao, 1M8 and 4B3 in Indonesia, 4A14 in the Philippines, 4D3 in East Timor, 5O3 and 5O4 in Mexico.

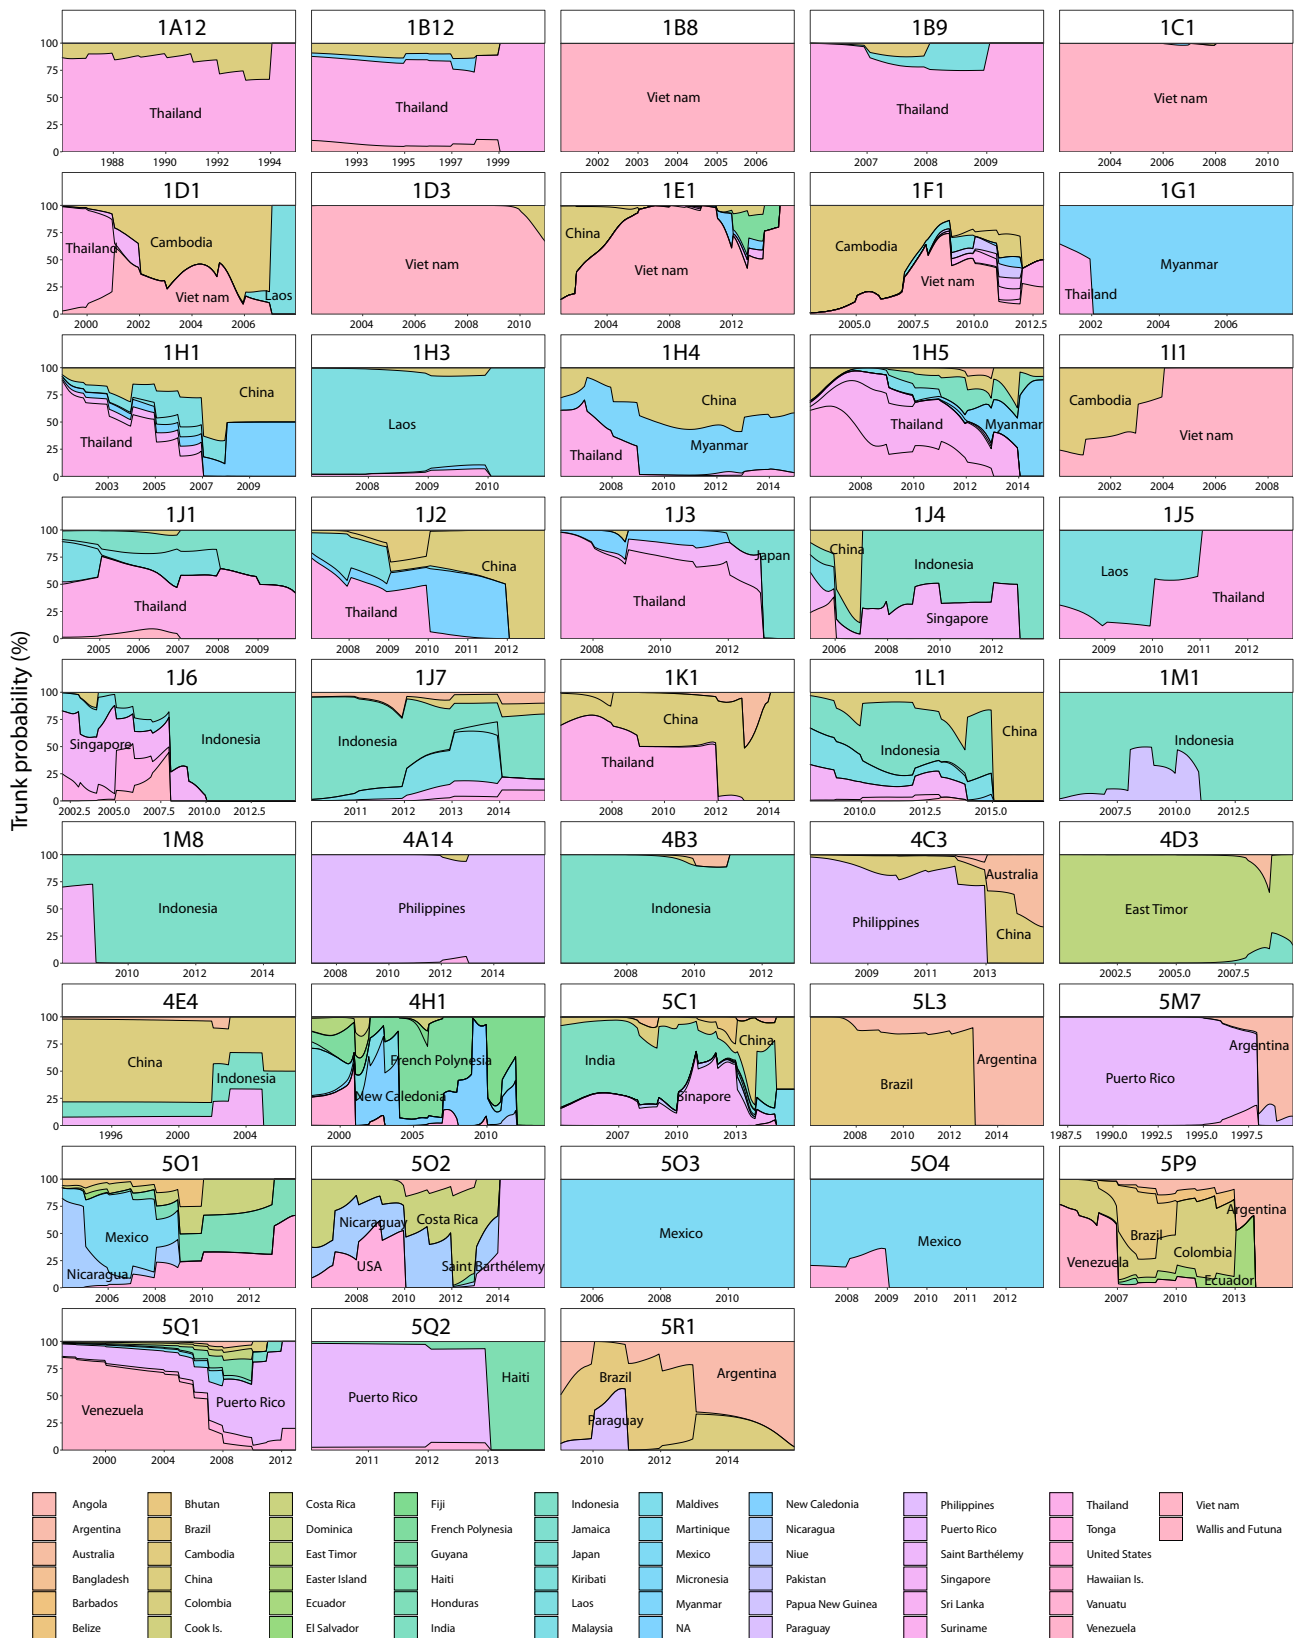

**Additional file 1 Fig. S G1 Dynamic changes of trunks representing the proportion of PACT-inferred dominant epidemic countries/areas for each DENV-1 clade circulation.** A total of 43 clades of DENV-1 were estimated by PACT. Coloured width at each time point indicates the posterior support for the DENV-1 clade circulating in the inferred dominant epidemic countries/areas, while colors indicate the countries/areas. PACT: posterior analysis of coalescent trees.

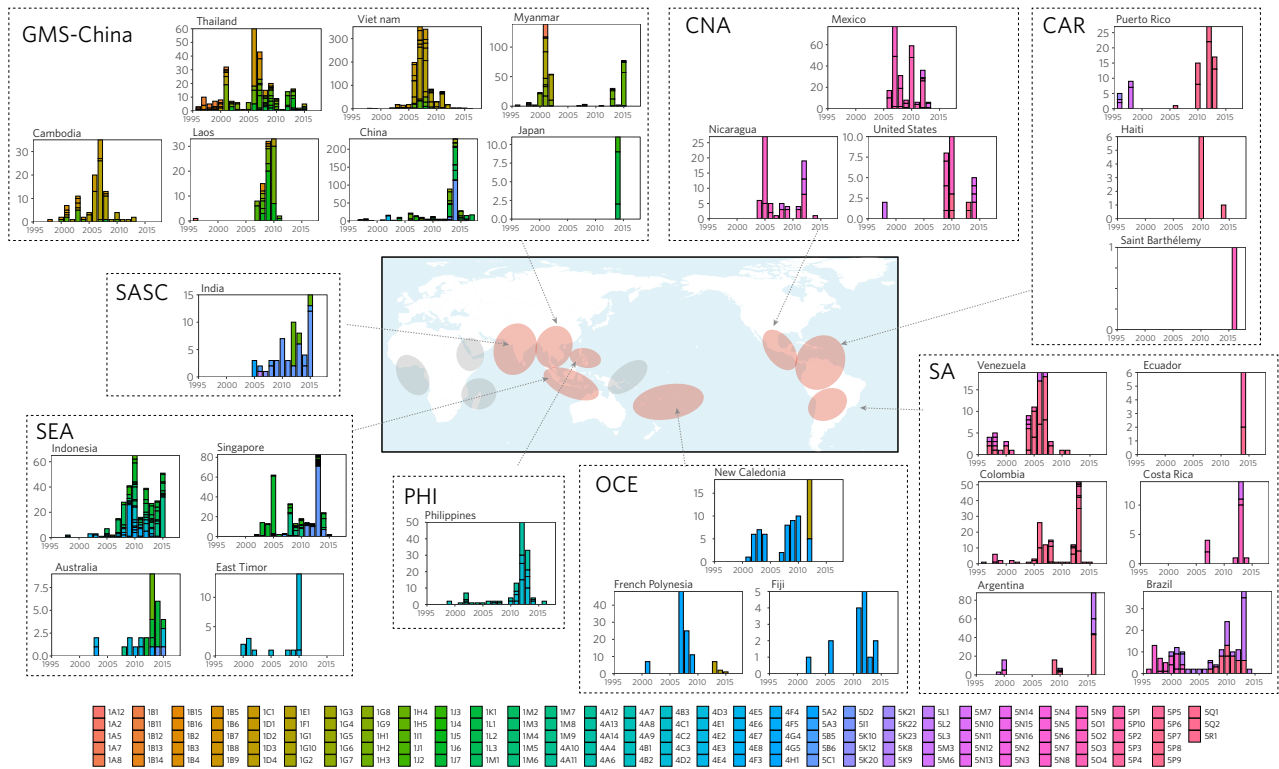

**Additional file 1 Fig. S G2 Temporal dynamics of clades in 28 PACT-inferred dominant countries/areas.** In each panel, the stacked barplots show reported sequences numbers, and the bars are colored to indicate the defined clades. The panels share the same x-axes (1995-2017), while the y-axes vary the corresponding maximum reported sequences number of source centers. SASC, South Asia Subcontinent; GMS-China, Great Mekong Subregion-China; SEA, Southeast Asia; PHI, Philippines; OCE, Oceania; CNA, Central North America; CAR, Caribbean; SA, South America

**Additional file 1 Table S G1 The status of 28 PACT-inferred dominant epidemic countries/areas and the clades of DENV-1 involved**

| No | Epidemic region | Country/area     | Involved DENV-1 clades inferred by PACT (Persisting years)                                                                                                                                                  | Clade numbers |
|----|-----------------|------------------|-------------------------------------------------------------------------------------------------------------------------------------------------------------------------------------------------------------|---------------|
| 1  |                 | Thailand         | 1A12(1986-1994), 1B9(2006-2009), 1B12(1991-2000), 1D1(1999-2000), 1G1(2001), 1H1(2001-2004), 1H4(2006-2007), 1H5(2006-2007), 1J1(2004-2008), 1J2(2007-2008), 1J3(2007-2012), 1J5(2010-2012), 1K1(2006-2011) | 13            |
| 2  | GMS-China       | China            | 1E1(2001-2002), 1H1(2007-2010), 1H4(2009-2012), 1J2(2012), 1J4(2006), 1K1(2012-2014), 1L1(2015-2017), 4C3(2013-2014), 4E4(1993-2002, 2007), 5C1(2013, 2015)                                                 | 10            |
| 3  |                 | Viet nam         | 1B8(2001-2007), 1C1(2002-2010), 1D2(2006-2011), 1D3(2002-2010), 1E1(2002-2015), 1F1(2007-2009), 1I1(2003-2008)                                                                                              | 7             |
| 4  |                 | Cambodia         | 1D1(2002-2006), 1F1(2003-2007, 2012), 1I1(2000-2002)                                                                                                                                                        | 3             |
| 5  |                 | Laos             | 1D1(2007), 1H3(2007-2010), 1J5(2008-2008)                                                                                                                                                                   | 3             |
| 6  |                 | Myanmar          | 1G1(2002-2007), 1H4(2009, 2013-2014)                                                                                                                                                                        | 2             |
| 7  |                 | Japan            | 1J3(2013)                                                                                                                                                                                                   | 1             |
| 8  |                 | Indonesia        | 1J1(2009), 1J4(2007-2013), 1J6(2008-2014), 1J7(2010-2012, 2014), 1L1(2010-2012, 2014), 1M1(2005-2014), 1M8(2009-2014), 4B3(2006-2012), 4E4(2005-2006), 4E8(2008-2011)                                       | 10            |
| 9  | SEA             | Singapore        | 1J4(2009, 2012), 1J6(2002-2004), 1M8(2008), 5C1(2010-2012)                                                                                                                                                  | 4             |
| 10 |                 | Australia        | 4C3(2014)                                                                                                                                                                                                   | 1             |
| 11 |                 | East Timor       | 4D3(2000-2009)                                                                                                                                                                                              | 1             |
| 12 | SASC            | India            | 5C1(2004-2014)                                                                                                                                                                                              | 1             |
| 13 | PHI             | Philippines      | 4A14(2007-2015), 4C3(2007-2012)                                                                                                                                                                             | 2             |
| 14 |                 | French Polynesia | 4H1(2001-2008)                                                                                                                                                                                              | 1             |
| 15 | OCE             | Fiji             | 4H1(2006-2013)                                                                                                                                                                                              | 1             |
| 16 |                 | New Caledonia    | 4H1(2001-2003, 2009)                                                                                                                                                                                        | 1             |
| 17 | SA              | Brazil           | 5L3(2006-2012), 5N7(1991-2001), 5P9(2007-2008), 5R1(2010-2012)                                                                                                                                              | 4             |
| 18 |                 | Argentina        | 5L3(2013-2015), 5M7(1998-1999), 5P9(2014-2015), 5R1(2013-2015)                                                                                                                                              | 4             |
| 19 |                 | Mexico           | 5O1(2005-2007), 5O3(2007-2011), 5O4(2007-2012)                                                                                                                                                              | 3             |
| 20 | CNA             | Nicaragua        | 5O1(2004)                                                                                                                                                                                                   | 1             |
| 21 |                 | United States    | 5O1(2013)                                                                                                                                                                                                   | 1             |
| 22 |                 | Puerto Rico      | 5M7(1987-1997), 5Q1(2008-2012), 5Q2(2010-2012)                                                                                                                                                              | 3             |
| 23 |                 | Colombia         | 5P8(1998-2009), 5P9(2010-2012)                                                                                                                                                                              | 2             |
| 24 |                 | Venezuela        | 5P9(2004-2006), 5Q1(1997-2005)                                                                                                                                                                              | 2             |
| 25 | CAR             | Ecuador          | 5P9(2013)                                                                                                                                                                                                   | 1             |
| 26 |                 | Costa Rica       | 5O2(2006, 2012-2013)                                                                                                                                                                                        |               |
| 27 |                 | Saint Barthélemy | 5O2(2014-2015)                                                                                                                                                                                              |               |
| 28 |                 | Haiti            | 5Q2(2014)                                                                                                                                                                                                   | 1             |

PACT: posterior analysis of coalescent trees. The clades are highlighted in light blue with a persistence of more than 5 years in the epidemic country/area.
